# Supplementary material for: Isolation and characterization of charge-tagged phenylperoxyl radicals in the gas phase: direct evidence for products and pathways in low temperature benzene oxidation
Source: Royal Society of Chemistry journal article supplement (doi:10.1039/c2cp43507a), 2012-01-01
Supplement: c2cp43507a_2.pdf [file c2cp43507a_2.pdf]

**A**

cph006

|                                                                                                                                                                                                                                                                                                                                                                             |                                                                                                                                                                                                                                                                                                                                                                                                                                                                                                                                                                               |                                                                                                                                                                                                                                                                                                                                                                           |
|-----------------------------------------------------------------------------------------------------------------------------------------------------------------------------------------------------------------------------------------------------------------------------------------------------------------------------------------------------------------------------|-------------------------------------------------------------------------------------------------------------------------------------------------------------------------------------------------------------------------------------------------------------------------------------------------------------------------------------------------------------------------------------------------------------------------------------------------------------------------------------------------------------------------------------------------------------------------------|---------------------------------------------------------------------------------------------------------------------------------------------------------------------------------------------------------------------------------------------------------------------------------------------------------------------------------------------------------------------------|
| b3lyp -419.7102154<br>uccsd(t) -418.6019879<br>ump2(3df,2p) -418.7551049<br>ump2(d,p) -418.4779541<br>rmp2(d,p) -418.514776589508<br>rccsd(t) -418.60483313<br>-----<br>ZPE 0.0882176<br>Thermal 0.0951963<br>S2: 0.757215<br>-----<br>G2M(UMP2,CC) Energy (0K): -418.7909211<br>T1 Diag: 0.03952695<br><br>G2M(UMP2,RCC) Energy (0K): -418.79376633<br>T1 Diag: 0.01703010 | Geometry:<br><br>C 0.000000000 2.276579527 0.939908204<br>C 0.000000000 -2.276579527 0.939908204<br>C 0.000000000 0.000000000 -0.403237321<br>C 0.000000000 -2.309028014 3.594126821<br>C 0.000000000 2.309028014 3.594126821<br>C 0.000000000 0.000000000 4.793097580<br>H 0.000000000 4.081882143 4.628247321<br>H 0.000000000 -4.081882143 4.628247321<br>H 0.000000000 -4.016013849 -0.145658200<br>H 0.000000000 4.016013849 -0.145658200<br>C 0.000000000 0.000000000 -3.343707873<br>O 0.000000000 2.142014019 -4.353156109<br>O 0.000000000 -2.142014019 -4.353156109 | Frequencies:<br><br>59.2802 166.5088 212.3496<br>363.9897 410.6883 435.9200<br>500.4471 608.2261 633.9453<br>670.3256 743.4431 790.4001<br>805.9433 834.5261 956.8322<br>976.5940 991.6082 1039.7994<br>1072.2428 1109.7431 1150.0888<br>1279.8527 1303.0409 1329.4732<br>1371.1995 1455.4895 1553.7858<br>1598.2112 1670.7826 3140.2659<br>3140.7785 3173.0384 3174.2199 |
|-----------------------------------------------------------------------------------------------------------------------------------------------------------------------------------------------------------------------------------------------------------------------------------------------------------------------------------------------------------------------------|-------------------------------------------------------------------------------------------------------------------------------------------------------------------------------------------------------------------------------------------------------------------------------------------------------------------------------------------------------------------------------------------------------------------------------------------------------------------------------------------------------------------------------------------------------------------------------|---------------------------------------------------------------------------------------------------------------------------------------------------------------------------------------------------------------------------------------------------------------------------------------------------------------------------------------------------------------------------|

**B**

cphG201

|                                                                                                                                                                                                                                                                                                                                                                                                   |                                                                                                                                                                                                                                                                                                                                                                                                                                                                                                                                                                                                                                                                                                |                                                                                                                                                                                                                                                                                                                                                                                                                                                           |
|---------------------------------------------------------------------------------------------------------------------------------------------------------------------------------------------------------------------------------------------------------------------------------------------------------------------------------------------------------------------------------------------------|------------------------------------------------------------------------------------------------------------------------------------------------------------------------------------------------------------------------------------------------------------------------------------------------------------------------------------------------------------------------------------------------------------------------------------------------------------------------------------------------------------------------------------------------------------------------------------------------------------------------------------------------------------------------------------------------|-----------------------------------------------------------------------------------------------------------------------------------------------------------------------------------------------------------------------------------------------------------------------------------------------------------------------------------------------------------------------------------------------------------------------------------------------------------|
| <p>b3lyp -570.1627048<br/>uccsd(t) -568.7167903<br/>ump2(3df,2p) -568.9464375<br/>ump2(d,p) -568.5754363<br/>rmp2(d,p) -568.604506191430<br/>rccsd(t) -568.71740363<br/>-----<br/>ZPE 0.0964437<br/>Thermal 0.1055352<br/>S2: 0.759675<br/>-----<br/>G2M(UMP2,CC) Energy (OK): -568.9913478<br/>T1 Diag: 0.03837182<br/><br/>G2M(UMP2,RCC) Energy (OK): -568.99196113<br/>T1 Diag: 0.02679834</p> | <p>Geometry:</p> <p>C -2.086868031 0.016931946 0.000015118<br/>C -0.552794026 -2.145209545 0.000026456<br/>C 2.069660184 -1.977018251 0.000003779<br/>C 3.156504044 0.422127023 -0.000005669<br/>C 1.692642814 2.619613952 -0.000024566<br/>C -0.923499712 2.394214978 0.000000000<br/>H -2.143588160 4.038957014 0.000022677<br/>H 2.626020124 4.444592397 -0.000013228<br/>H 3.272344255 -3.629511943 0.000035905<br/>H -1.501500795 -3.960514482 0.000103935<br/>O 5.755552107 0.843860983 0.000034015<br/>O 7.227318061 -1.193335596 0.000039684<br/>C -5.014768125 -0.218161323 -0.000026456<br/>O -6.181876212 1.839434850 -0.000081258<br/>O -5.838310773 -2.436023279 -0.000001890</p> | <p>Frequencies:</p> <p>35.0489 75.1162 129.1457<br/>168.0291 269.0115 292.6376<br/>322.4467 418.1161 478.4439<br/>490.4403 522.9133 633.6555<br/>647.9454 651.5536 774.8062<br/>776.0260 827.8765 835.1498<br/>869.1315 971.4584 999.7419<br/>1021.9130 1082.9191 1093.7639<br/>1116.7817 1143.4438 1172.6143<br/>1293.2542 1325.4938 1350.0548<br/>1428.2713 1487.3010 1594.3354<br/>1608.7174 1668.8493 3168.9865<br/>3186.3418 3191.5680 3210.5845</p> |
|---------------------------------------------------------------------------------------------------------------------------------------------------------------------------------------------------------------------------------------------------------------------------------------------------------------------------------------------------------------------------------------------------|------------------------------------------------------------------------------------------------------------------------------------------------------------------------------------------------------------------------------------------------------------------------------------------------------------------------------------------------------------------------------------------------------------------------------------------------------------------------------------------------------------------------------------------------------------------------------------------------------------------------------------------------------------------------------------------------|-----------------------------------------------------------------------------------------------------------------------------------------------------------------------------------------------------------------------------------------------------------------------------------------------------------------------------------------------------------------------------------------------------------------------------------------------------------|

**B->T**

cphG901

|                                                                                                                                                                                                                                                                                                                                                                                                   |                                                                                                                                                                                                                                                                                                                                                                                                                                                                                                                                                                                                                                                                                                 |                                                                                                                                                                                                                                                                                                                                                                                                                                                            |
|---------------------------------------------------------------------------------------------------------------------------------------------------------------------------------------------------------------------------------------------------------------------------------------------------------------------------------------------------------------------------------------------------|-------------------------------------------------------------------------------------------------------------------------------------------------------------------------------------------------------------------------------------------------------------------------------------------------------------------------------------------------------------------------------------------------------------------------------------------------------------------------------------------------------------------------------------------------------------------------------------------------------------------------------------------------------------------------------------------------|------------------------------------------------------------------------------------------------------------------------------------------------------------------------------------------------------------------------------------------------------------------------------------------------------------------------------------------------------------------------------------------------------------------------------------------------------------|
| <p>b3lyp -570.0870295<br/>uccsd(t) -568.6453982<br/>ump2(3df,2p) -568.8631592<br/>ump2(d,p) -568.4873047<br/>rmp2(d,p) -568.539062144772<br/>rccsd(t) -568.64687492<br/>-----<br/>ZPE 0.0940185<br/>Thermal 0.1025255<br/>S2: 0.781193<br/>-----<br/>G2M(UMP2,CC) Energy (OK): -568.9272342<br/>T1 Diag: 0.03936328<br/><br/>G2M(UMP2,RCC) Energy (OK): -568.92871092<br/>T1 Diag: 0.02091431</p> | <p>Geometry:</p> <p>C 1.837607485 3.084552721 0.097031768<br/>C 3.369791763 1.035176857 0.480321139<br/>C 2.492293654 -1.549722826 0.882143055<br/>C -0.168317907 -1.979985121 0.341645477<br/>C -1.747590380 0.073523575 0.094979525<br/>C -0.778994244 2.590922241 0.094971966<br/>H 2.597284948 4.931317819 -0.363005051<br/>H 3.207609797 -2.540536473 2.552137501<br/>H -1.001186353 -3.848650254 0.416138481<br/>H -2.157477648 4.092971056 -0.083142281<br/>C -4.665399337 -0.324842032 -0.135379980<br/>O -5.928480945 1.674834035 -0.246099034<br/>O -5.376915241 -2.574776421 -0.184425932<br/>O 5.767170143 0.533303391 -0.308352282<br/>O 4.952902271 -2.159968307 -0.968174727</p> | <p>Frequencies:</p> <p>-263.5302 47.8125 109.9684<br/>173.2910 197.6458 294.9839<br/>335.2912 418.5040 475.1149<br/>496.7296 560.9298 585.3656<br/>632.8031 648.6830 723.9798<br/>754.4522 788.9184 805.5009<br/>841.3955 878.9615 902.5576<br/>968.3621 1011.1908 1070.6801<br/>1097.7286 1186.5235 1212.1527<br/>1276.4886 1314.4364 1322.4326<br/>1351.9000 1426.6003 1521.0821<br/>1584.4139 1680.5753 3014.2558<br/>3168.7119 3190.7584 3198.1479</p> |
|---------------------------------------------------------------------------------------------------------------------------------------------------------------------------------------------------------------------------------------------------------------------------------------------------------------------------------------------------------------------------------------------------|-------------------------------------------------------------------------------------------------------------------------------------------------------------------------------------------------------------------------------------------------------------------------------------------------------------------------------------------------------------------------------------------------------------------------------------------------------------------------------------------------------------------------------------------------------------------------------------------------------------------------------------------------------------------------------------------------|------------------------------------------------------------------------------------------------------------------------------------------------------------------------------------------------------------------------------------------------------------------------------------------------------------------------------------------------------------------------------------------------------------------------------------------------------------|

**B->G**

cphG1501

|                                                                                                                                                                                                                                                                                                                                                                                                |                                                                                                                                                                                                                                                                                                                                                                                                                                                                                                                                                                                                                                                                                                  |                                                                                                                                                                                                                                                                                                                                                                                                                                                           |
|------------------------------------------------------------------------------------------------------------------------------------------------------------------------------------------------------------------------------------------------------------------------------------------------------------------------------------------------------------------------------------------------|--------------------------------------------------------------------------------------------------------------------------------------------------------------------------------------------------------------------------------------------------------------------------------------------------------------------------------------------------------------------------------------------------------------------------------------------------------------------------------------------------------------------------------------------------------------------------------------------------------------------------------------------------------------------------------------------------|-----------------------------------------------------------------------------------------------------------------------------------------------------------------------------------------------------------------------------------------------------------------------------------------------------------------------------------------------------------------------------------------------------------------------------------------------------------|
| <p>b3lyp -570.1240004<br/>uccsd(t) -568.676382<br/>ump2(3df,2p) -568.913258<br/>ump2(d,p) -568.5351846<br/>rmp2(d,p) -568.570278922940<br/>rccsd(t) -568.67651502<br/>-----<br/>ZPE 0.0941204<br/>Thermal 0.1030146<br/>S2: 0.77335<br/>-----<br/>G2M(UMP2,CC) Energy (OK): -568.9603350<br/>T1 Diag: 0.03495732<br/><br/>G2M(UMP2,RCC) Energy (OK): -568.96046802<br/>T1 Diag: 0.02527105</p> | <p>Geometry:</p> <p>C 1.999445520 -2.215507358 -0.776584843<br/>C 3.368741075 0.078695755 -0.365599645<br/>C 1.992540461 2.350900566 0.136502477<br/>C -0.588789530 -2.231339483 -0.577396371<br/>C -1.953893672 0.006820022 -0.047662672<br/>C -0.597642897 2.288061503 0.287438683<br/>H 3.078919448 -3.900447648 -1.210142820<br/>H 3.066345210 4.077337352 0.378842846<br/>H -1.678621046 3.997271545 0.609733364<br/>H -1.656048267 -3.962980575 -0.814857467<br/>C -4.825544178 -0.031849444 0.116514844<br/>O -5.764263744 -1.955823082 1.125037114<br/>O -5.916794878 1.866707377 -0.784737122<br/>O 5.910870587 -0.333801224 1.726569067<br/>O 5.872720796 0.212184119 -1.017224459</p> | <p>Frequencies:</p> <p>-365.9074 52.0053 79.7837<br/>167.5435 191.0193 218.7255<br/>314.6296 357.1887 395.9737<br/>431.8875 497.1091 584.7151<br/>621.3325 676.9200 742.2273<br/>769.6074 796.5397 798.4391<br/>845.5992 863.5924 966.2523<br/>978.7409 1005.2901 1107.1877<br/>1124.4547 1173.1295 1255.9873<br/>1292.7709 1315.0073 1344.1848<br/>1451.8665 1470.3106 1509.3533<br/>1568.8179 1596.8010 3178.9405<br/>3180.1233 3194.0624 3195.9745</p> |
|------------------------------------------------------------------------------------------------------------------------------------------------------------------------------------------------------------------------------------------------------------------------------------------------------------------------------------------------------------------------------------------------|--------------------------------------------------------------------------------------------------------------------------------------------------------------------------------------------------------------------------------------------------------------------------------------------------------------------------------------------------------------------------------------------------------------------------------------------------------------------------------------------------------------------------------------------------------------------------------------------------------------------------------------------------------------------------------------------------|-----------------------------------------------------------------------------------------------------------------------------------------------------------------------------------------------------------------------------------------------------------------------------------------------------------------------------------------------------------------------------------------------------------------------------------------------------------|

**C**

cphG301

|                                          |                                         |                               |
|------------------------------------------|-----------------------------------------|-------------------------------|
| b3lyp -495.0174528                       | Geometry:                               | Frequencies:                  |
| uccsd(t) -493.7356077                    |                                         |                               |
| ump2(3df,2p) -493.9298269                | C 1.285159278 -0.000045353 -0.000168186 | 54.6263 90.5675 177.3789      |
| ump2(d,p) -493.6030539                   | C -0.084491545 -2.271772063 0.376176443 | 226.4738 329.6766 370.5577    |
| rmp2(d,p) -493.643672053599              | C -2.675995821 -2.294044376 0.399444640 | 384.8725 452.5884 533.7070    |
| rccsd(t) -493.73651027                   | C -4.131370291 -0.000024566 0.000011338 | 609.8527 615.1083 702.7859    |
| -----                                    | C -2.676020388 2.293982015 -0.399546686 | 752.3946 789.3866 792.7591    |
| ZPE 0.0923546                            | C -0.084531229 2.271713482 -0.376380533 | 814.0116 864.1134 965.9774    |
| Thermal 0.1004506                        | H 0.994925690 3.997328237 -0.614623976  | 981.0304 991.4702 1100.8367   |
| S2: 0.772056                             | H -3.738774018 4.022873555 -0.697361855 | 1123.5857 1176.7412 1267.9891 |
| -----                                    | H -3.738741893 -4.022945365 0.697231464 | 1298.4803 1347.1860 1414.0017 |
| G2M(UMP2,CC) Energy (0K): -493.9700261   | H 0.994954036 -3.997441621 0.614123198  | 1453.5188 1485.4888 1525.8865 |
| T1 Diag: 0.03652378                      | O -6.506485807 -0.000041574 0.000120942 | 1565.9746 1597.9386 3159.6289 |
|                                          | C 4.156348691 -0.000090707 -0.000026456 | 3160.0173 3180.1490 3182.2383 |
| G2M(UMP2,RCC) Energy (0K): -493.97092867 | O 5.174914855 1.847692953 1.075135116   |                               |
| T1 Diag: 0.02073918                      | O 5.175700981 -1.847417053 -1.074811973 |                               |

**G**

cphG706

|                                                                                                                                                                                                                                                                                                                                                                             |                                                                                                                                                                                                                                                                                                                                                                                                                                                                                                                                                                                                                                                                        |                                                                                                                                                                                                                                                                                                                                                                                                                                      |
|-----------------------------------------------------------------------------------------------------------------------------------------------------------------------------------------------------------------------------------------------------------------------------------------------------------------------------------------------------------------------------|------------------------------------------------------------------------------------------------------------------------------------------------------------------------------------------------------------------------------------------------------------------------------------------------------------------------------------------------------------------------------------------------------------------------------------------------------------------------------------------------------------------------------------------------------------------------------------------------------------------------------------------------------------------------|--------------------------------------------------------------------------------------------------------------------------------------------------------------------------------------------------------------------------------------------------------------------------------------------------------------------------------------------------------------------------------------------------------------------------------------|
| b3lyp -570.1299955<br>uccsd(t) -568.6918336<br>ump2(3df,2p) -568.9389265<br>ump2(d,p) -568.5621097<br>rmp2(d,p) -568.585668217339<br>rccsd(t) -568.69185945<br>-----<br>ZPE 0.0948609<br>Thermal 0.1039164<br>S2: 0.770887<br>-----<br>G2M(UMP2,CC) Energy (OK): -568.9737895<br>T1 Diag: 0.03052181<br><br>G2M(UMP2,RCC) Energy (OK): -568.97381535<br>T1 Diag: 0.02032933 | Geometry:<br><br>C -2.356322190 -0.000051023 -2.015785982<br>C 2.356322190 0.000051023 -2.015785982<br>C 0.000000000 0.000000000 -3.471186908<br>C 2.308478104 -0.017767205 0.562070692<br>C -2.308478104 0.017767205 0.562070692<br>C 0.000000000 0.000000000 1.940816767<br>H -4.100694367 0.003161512 -3.090125524<br>H 4.100694367 -0.003161512 -3.090125524<br>H 4.044314388 -0.075239446 1.648502591<br>H -4.044314388 0.075239446 1.648502591<br>O 0.000000000 -1.409089408 -5.794206455<br>O 0.000000000 1.409089408 -5.794206455<br>C 0.000000000 0.000000000 4.815160133<br>O -1.809979689 1.142749517 5.832898597<br>O 1.809979689 -1.142749517 5.832898597 | Frequencies:<br><br>54.4771 69.0716 166.5435<br>196.1191 287.1981 303.1153<br>355.8220 401.1608 450.4924<br>474.8012 543.8461 573.7062<br>607.7353 696.7709 719.5128<br>760.6894 774.6436 783.6246<br>824.5947 868.6489 969.3494<br>976.5479 986.0615 1099.3570<br>1108.3859 1171.1040 1219.3829<br>1278.2579 1298.4915 1333.4580<br>1422.8830 1446.8461 1506.1794<br>1580.4749 1606.8432 3172.1448<br>3172.6497 3188.0307 3190.1048 |
|-----------------------------------------------------------------------------------------------------------------------------------------------------------------------------------------------------------------------------------------------------------------------------------------------------------------------------------------------------------------------------|------------------------------------------------------------------------------------------------------------------------------------------------------------------------------------------------------------------------------------------------------------------------------------------------------------------------------------------------------------------------------------------------------------------------------------------------------------------------------------------------------------------------------------------------------------------------------------------------------------------------------------------------------------------------|--------------------------------------------------------------------------------------------------------------------------------------------------------------------------------------------------------------------------------------------------------------------------------------------------------------------------------------------------------------------------------------------------------------------------------------|

**G->U**

cphG4401

|                                                                                                                                                                                                                                                                                                                                                                                                                                                                                                                                                                                                                                                                                                                                   |                                                                                                                                                                                                                                                                                                                                                                                                                                                                                                                                                                                                                                                                                                                                                                                                                                                                                                                                                                                                      |                                                                                                                                                                                                                                                                                                                                                                                                                                                                                                                                                                                                                                                                                                                      |
|-----------------------------------------------------------------------------------------------------------------------------------------------------------------------------------------------------------------------------------------------------------------------------------------------------------------------------------------------------------------------------------------------------------------------------------------------------------------------------------------------------------------------------------------------------------------------------------------------------------------------------------------------------------------------------------------------------------------------------------|------------------------------------------------------------------------------------------------------------------------------------------------------------------------------------------------------------------------------------------------------------------------------------------------------------------------------------------------------------------------------------------------------------------------------------------------------------------------------------------------------------------------------------------------------------------------------------------------------------------------------------------------------------------------------------------------------------------------------------------------------------------------------------------------------------------------------------------------------------------------------------------------------------------------------------------------------------------------------------------------------|----------------------------------------------------------------------------------------------------------------------------------------------------------------------------------------------------------------------------------------------------------------------------------------------------------------------------------------------------------------------------------------------------------------------------------------------------------------------------------------------------------------------------------------------------------------------------------------------------------------------------------------------------------------------------------------------------------------------|
| <p>b3lyp -570.1183852<br/>                     uccsd(t) -568.6803298<br/>                     ump2(3df,2p) -568.9229845<br/>                     ump2(d,p) -568.5464222<br/>                     rmp2(d,p) -568.569625612715<br/>                     rccsd(t) -568.68014660<br/>                     -----<br/>                     ZPE 0.0935082<br/>                     Thermal 0.1024851<br/>                     S2: 0.767996<br/>                     -----<br/>                     G2M(UMP2,CC) Energy (OK): -568.9633839<br/>                     T1 Diag: 0.03323458<br/>                     -----<br/>                     G2M(UMP2,RCC) Energy (OK): -568.96320070<br/>                     T1 Diag: 0.02301438</p> | <p>Geometry:</p> <p>H 3.109138058 -3.999807558 -0.927001374<br/>                     C 2.035017725 -2.298215001 -0.537993691<br/>                     C 3.554746818 0.000000000 0.000000000<br/>                     C 2.035017725 2.298216891 0.537991802<br/>                     C -0.537135756 2.261645021 0.508551758<br/>                     C -0.537135756 -2.261643131 -0.508553648<br/>                     C -1.904106947 0.000001890 -0.000001890<br/>                     H 3.109139948 3.999809448 0.926997595<br/>                     H -1.622760741 3.967054825 0.840147672<br/>                     H -1.622762631 -3.967051045 -0.840149561<br/>                     O 5.635390091 -0.371678894 1.579474675<br/>                     O 5.635390091 0.371678894 -1.579474675<br/>                     C -4.768886409 0.000001890 0.000000000<br/>                     O -5.775267619 1.801545841 -1.156211926<br/>                     O -5.775243053 -1.801553400 1.156215705</p> | <p>Frequencies:</p> <p>-959.0335 49.3154 70.5782<br/>                     161.5322 193.9025 255.1329<br/>                     307.7017 329.0458 401.9760<br/>                     442.2598 474.7087 563.9335<br/>                     598.1926 659.3288 739.0974<br/>                     753.4639 770.0596 781.9816<br/>                     826.2670 871.2414 968.9364<br/>                     972.3116 980.4105 1096.3809<br/>                     1123.1703 1174.6786 1235.2184<br/>                     1267.5305 1306.0480 1356.5793<br/>                     1417.9846 1447.6612 1511.3173<br/>                     1598.5592 1622.6177 3170.3771<br/>                     3170.5529 3186.5305 3188.7787</p> |
|-----------------------------------------------------------------------------------------------------------------------------------------------------------------------------------------------------------------------------------------------------------------------------------------------------------------------------------------------------------------------------------------------------------------------------------------------------------------------------------------------------------------------------------------------------------------------------------------------------------------------------------------------------------------------------------------------------------------------------------|------------------------------------------------------------------------------------------------------------------------------------------------------------------------------------------------------------------------------------------------------------------------------------------------------------------------------------------------------------------------------------------------------------------------------------------------------------------------------------------------------------------------------------------------------------------------------------------------------------------------------------------------------------------------------------------------------------------------------------------------------------------------------------------------------------------------------------------------------------------------------------------------------------------------------------------------------------------------------------------------------|----------------------------------------------------------------------------------------------------------------------------------------------------------------------------------------------------------------------------------------------------------------------------------------------------------------------------------------------------------------------------------------------------------------------------------------------------------------------------------------------------------------------------------------------------------------------------------------------------------------------------------------------------------------------------------------------------------------------|

## U

cphG4501

|                                                                                                                                                                                                                                                                                                                                                                             |                                                                                                                                                                                                                                                                                                                                                                                                                                                                                                                                                                                                                                                                             |                                                                                                                                                                                                                                                                                                                                                                                                                                      |
|-----------------------------------------------------------------------------------------------------------------------------------------------------------------------------------------------------------------------------------------------------------------------------------------------------------------------------------------------------------------------------|-----------------------------------------------------------------------------------------------------------------------------------------------------------------------------------------------------------------------------------------------------------------------------------------------------------------------------------------------------------------------------------------------------------------------------------------------------------------------------------------------------------------------------------------------------------------------------------------------------------------------------------------------------------------------------|--------------------------------------------------------------------------------------------------------------------------------------------------------------------------------------------------------------------------------------------------------------------------------------------------------------------------------------------------------------------------------------------------------------------------------------|
| b3lyp -570.1428797<br>uccsd(t) -568.6856392<br>ump2(3df,2p) -568.9479684<br>ump2(d,p) -568.5647097<br>rmp2(d,p) -568.533579279641<br>rccsd(t) -568.65129786<br>-----<br>ZPE 0.0943042<br>Thermal 0.1040115<br>S2: 0.758575<br>-----<br>G2M(UMP2,CC) Energy (OK): -568.9745937<br>T1 Diag: 0.03148532<br><br>G2M(UMP2,RCC) Energy (OK): -568.94025236<br>T1 Diag: 0.05337313 | Geometry:<br><br>H 3.151672014 -4.101497500 -0.004956752<br>C 2.065283579 -2.362399549 -0.002910178<br>C 3.657175644 0.000000000 -0.000015118<br>C 2.065283579 2.362399549 0.002883722<br>C -0.496068227 2.348602659 0.002834589<br>C -0.496068227 -2.348602659 -0.002887502<br>C -1.835449417 0.000000000 -0.000100155<br>H 3.151673904 4.101497500 0.004941634<br>H -1.589968324 4.081723406 0.004847148<br>H -1.589968324 -4.081723406 -0.004884942<br>O 5.338164516 -0.002424519 1.981203994<br>O 5.338162627 0.002424519 -1.981232340<br>C -4.673224693 0.000000000 -0.000034015<br>O -5.641231235 0.004843368 -2.144372397<br>O -5.640717229 -0.004845258 2.144578377 | Frequencies:<br><br>40.4280 59.7057 98.1248<br>183.1684 188.2208 195.6262<br>282.8251 373.2207 427.0981<br>450.2263 456.4393 570.8276<br>618.2310 719.8670 737.6614<br>789.4534 789.8935 790.3279<br>846.0547 924.4512 966.1192<br>983.6727 1003.8317 1079.7058<br>1124.2940 1157.0061 1214.0184<br>1226.7116 1334.0329 1412.3090<br>1413.7536 1442.4611 1516.4697<br>1635.2848 1646.6034 3162.2170<br>3162.8048 3184.3224 3187.3080 |
|-----------------------------------------------------------------------------------------------------------------------------------------------------------------------------------------------------------------------------------------------------------------------------------------------------------------------------------------------------------------------------|-----------------------------------------------------------------------------------------------------------------------------------------------------------------------------------------------------------------------------------------------------------------------------------------------------------------------------------------------------------------------------------------------------------------------------------------------------------------------------------------------------------------------------------------------------------------------------------------------------------------------------------------------------------------------------|--------------------------------------------------------------------------------------------------------------------------------------------------------------------------------------------------------------------------------------------------------------------------------------------------------------------------------------------------------------------------------------------------------------------------------------|



**U->H**

cphG1405

|                                                                                                                                                                                                                                                                                                                                                                             |                                                                                                                                                                                                                                                                                                                                                                                                                                                                                                                                                                                                                                                                             |                                                                                                                                                                                                                                                                                                                                                                                                                                       |
|-----------------------------------------------------------------------------------------------------------------------------------------------------------------------------------------------------------------------------------------------------------------------------------------------------------------------------------------------------------------------------|-----------------------------------------------------------------------------------------------------------------------------------------------------------------------------------------------------------------------------------------------------------------------------------------------------------------------------------------------------------------------------------------------------------------------------------------------------------------------------------------------------------------------------------------------------------------------------------------------------------------------------------------------------------------------------|---------------------------------------------------------------------------------------------------------------------------------------------------------------------------------------------------------------------------------------------------------------------------------------------------------------------------------------------------------------------------------------------------------------------------------------|
| b3lyp -570.1405838<br>uccsd(t) -568.6820251<br>ump2(3df,2p) -568.9277681<br>ump2(d,p) -568.5480685<br>rmp2(d,p) -568.581563960732<br>rccsd(t) -568.68300047<br>-----<br>ZPE 0.0931649<br>Thermal 0.1022354<br>S2: 0.797461<br>-----<br>G2M(UMP2,CC) Energy (OK): -568.9685598<br>T1 Diag: 0.04620050<br><br>G2M(UMP2,RCC) Energy (OK): -568.96953517<br>T1 Diag: 0.03110352 | Geometry:<br><br>H -3.086285600 4.134718886 1.116087371<br>C -2.097384357 2.400700518 0.645358481<br>C -3.814867620 0.183889250 0.000192752<br>C -2.234223205 -2.168572230 -0.677994052<br>C 0.354900016 -2.181734172 -0.650411609<br>C 0.448363981 2.290450116 0.609049284<br>C 1.747956987 -0.009692405 -0.023530870<br>H -3.368346122 -3.779692258 -1.211295553<br>H 1.360582028 -3.896745674 -1.151323204<br>H 1.581959664 3.944036071 1.033513898<br>O -4.636989194 -1.005079189 2.131594069<br>O -5.326920646 0.683924012 -1.917954860<br>C 4.601373526 -0.043291736 -0.034472384<br>O 5.591353803 -0.830209602 1.949923357<br>O 5.556975905 0.747263853 -2.038080971 | Frequencies:<br><br>-166.2868 22.4980 75.9877<br>171.7846 184.6603 236.2958<br>272.7053 357.0260 394.3654<br>411.9653 477.7839 579.0300<br>627.5780 654.9153 756.8979<br>769.6820 780.4120 788.5710<br>820.6358 883.5475 934.7091<br>972.8878 979.9373 1066.8702<br>1135.6462 1142.6312 1190.9356<br>1201.7547 1296.6873 1397.5488<br>1402.0502 1431.1769 1464.0005<br>1625.1430 1651.6347 3159.9702<br>3160.9103 3180.2110 3233.6196 |
|-----------------------------------------------------------------------------------------------------------------------------------------------------------------------------------------------------------------------------------------------------------------------------------------------------------------------------------------------------------------------------|-----------------------------------------------------------------------------------------------------------------------------------------------------------------------------------------------------------------------------------------------------------------------------------------------------------------------------------------------------------------------------------------------------------------------------------------------------------------------------------------------------------------------------------------------------------------------------------------------------------------------------------------------------------------------------|---------------------------------------------------------------------------------------------------------------------------------------------------------------------------------------------------------------------------------------------------------------------------------------------------------------------------------------------------------------------------------------------------------------------------------------|

T

cphG801

|                                                                                                                                                                                                                                                                                                                                                                                                                                                                                                                                                                                                                                                                                                          |                                                                                                                                                                                                                                                                                                                                                                                                                                                                                                                                                                                                                                                                                                                                                                                                                                                                                                                                                                                                       |                                                                                                                                                                                                                                                                                                                                                                                                                                                                                                                                                                                                                                                                                                                       |
|----------------------------------------------------------------------------------------------------------------------------------------------------------------------------------------------------------------------------------------------------------------------------------------------------------------------------------------------------------------------------------------------------------------------------------------------------------------------------------------------------------------------------------------------------------------------------------------------------------------------------------------------------------------------------------------------------------|-------------------------------------------------------------------------------------------------------------------------------------------------------------------------------------------------------------------------------------------------------------------------------------------------------------------------------------------------------------------------------------------------------------------------------------------------------------------------------------------------------------------------------------------------------------------------------------------------------------------------------------------------------------------------------------------------------------------------------------------------------------------------------------------------------------------------------------------------------------------------------------------------------------------------------------------------------------------------------------------------------|-----------------------------------------------------------------------------------------------------------------------------------------------------------------------------------------------------------------------------------------------------------------------------------------------------------------------------------------------------------------------------------------------------------------------------------------------------------------------------------------------------------------------------------------------------------------------------------------------------------------------------------------------------------------------------------------------------------------------|
| <p>b3lyp -570.1962684<br/>                     uccsd(t) -568.7514503<br/>                     ump2(3df,2p) -568.9772212<br/>                     ump2(d,p) -568.6053906<br/>                     rmp2(d,p) -568.635909977192<br/>                     rccsd(t) -568.75303223<br/>                     -----<br/>                     ZPE 0.0954597<br/>                     Thermal 0.1048513<br/>                     S2: 0.770378<br/>                     -----<br/>                     G2M(UMP2,CC) Energy (OK): -569.0278212<br/>                     T1 Diag: 0.04025838<br/> <br/>                     G2M(UMP2,RCC) Energy (OK): -569.02940313<br/>                     T1 Diag: 0.02337474</p> | <p>Geometry:</p> <p>C -2.192694584 2.842580849 0.149545367<br/>                     C -3.841527877 0.705831607 -0.454212683<br/>                     C -2.682226248 -1.961756822 -0.221067722<br/>                     C 0.190410695 -2.008340461 -0.411310231<br/>                     C 1.584790474 0.115199595 -0.123128886<br/>                     C 0.341630359 2.533737238 0.287168452<br/>                     H -3.076555400 4.685458780 0.316292911<br/>                     H 1.091405658 -3.833077021 -0.609824071<br/>                     H 1.591699313 4.111021720 0.675845433<br/>                     H -3.578803032 -3.209144255 -1.628033077<br/>                     O -6.056799018 0.950212880 -1.067030081<br/>                     O -2.877914948 -2.824677584 2.214946109<br/>                     C 4.508497266 0.004363378 -0.174142042<br/>                     O 5.486615732 -1.793945362 -1.325852641<br/>                     O 5.512969853 1.775416598 1.044009437</p> | <p>Frequencies:</p> <p>43.4948 78.4179 114.1069<br/>                     179.6083 223.4705 245.5301<br/>                     329.9949 356.3200 413.1664<br/>                     449.5717 530.9494 574.2657<br/>                     607.6172 696.7534 748.3461<br/>                     758.2017 786.5831 848.1203<br/>                     886.0785 948.8235 969.1309<br/>                     1024.3741 1067.6811 1070.7155<br/>                     1150.3368 1225.2576 1247.5549<br/>                     1290.6245 1306.8574 1312.8836<br/>                     1407.8745 1530.6060 1619.6721<br/>                     1646.7068 1711.4699 2944.3912<br/>                     3161.1000 3184.7508 3210.5541</p> |
|----------------------------------------------------------------------------------------------------------------------------------------------------------------------------------------------------------------------------------------------------------------------------------------------------------------------------------------------------------------------------------------------------------------------------------------------------------------------------------------------------------------------------------------------------------------------------------------------------------------------------------------------------------------------------------------------------------|-------------------------------------------------------------------------------------------------------------------------------------------------------------------------------------------------------------------------------------------------------------------------------------------------------------------------------------------------------------------------------------------------------------------------------------------------------------------------------------------------------------------------------------------------------------------------------------------------------------------------------------------------------------------------------------------------------------------------------------------------------------------------------------------------------------------------------------------------------------------------------------------------------------------------------------------------------------------------------------------------------|-----------------------------------------------------------------------------------------------------------------------------------------------------------------------------------------------------------------------------------------------------------------------------------------------------------------------------------------------------------------------------------------------------------------------------------------------------------------------------------------------------------------------------------------------------------------------------------------------------------------------------------------------------------------------------------------------------------------------|

**T->H**

cphG4301

|                                                                                                                                                                                                                                                                                                                                                                                                                                                                                                                                                                                                                                                                                                         |                                                                                                                                                                                                                                                                                                                                                                                                                                                                                                                                                                                                                                                                                                                                                                                                                                                                                                                                                                                                        |                                                                                                                                                                                                                                                                                                                                                                                                                                                                                                                                                                                                                                                                                                                        |
|---------------------------------------------------------------------------------------------------------------------------------------------------------------------------------------------------------------------------------------------------------------------------------------------------------------------------------------------------------------------------------------------------------------------------------------------------------------------------------------------------------------------------------------------------------------------------------------------------------------------------------------------------------------------------------------------------------|--------------------------------------------------------------------------------------------------------------------------------------------------------------------------------------------------------------------------------------------------------------------------------------------------------------------------------------------------------------------------------------------------------------------------------------------------------------------------------------------------------------------------------------------------------------------------------------------------------------------------------------------------------------------------------------------------------------------------------------------------------------------------------------------------------------------------------------------------------------------------------------------------------------------------------------------------------------------------------------------------------|------------------------------------------------------------------------------------------------------------------------------------------------------------------------------------------------------------------------------------------------------------------------------------------------------------------------------------------------------------------------------------------------------------------------------------------------------------------------------------------------------------------------------------------------------------------------------------------------------------------------------------------------------------------------------------------------------------------------|
| <p>b3lyp -570.1938813<br/>                     uccsd(t) -568.752314<br/>                     ump2(3df,2p) -569.0044607<br/>                     ump2(d,p) -568.6337245<br/>                     rmp2(d,p) -568.633043987619<br/>                     rccsd(t) -568.75106874<br/>                     -----<br/>                     ZPE 0.0938762<br/>                     Thermal 0.1027922<br/>                     S2: 0.756976<br/>                     -----<br/>                     G2M(UMP2,CC) Energy (OK): -569.0291740<br/>                     T1 Diag: 0.02361055<br/> <br/>                     G2M(UMP2,RCC) Energy (OK): -569.02792874<br/>                     T1 Diag: 0.02405945</p> | <p>Geometry:</p> <p>C -2.653940828 -1.960001267 -0.362430575<br/>                     C -3.814998011 0.876060027 -0.367727477<br/>                     C 0.462168430 2.494517862 0.381804047<br/>                     C -2.066638512 2.886562335 0.286482482<br/>                     C 1.661107064 0.068840833 -0.076804139<br/>                     C 0.213930226 -1.981024470 -0.438061194<br/>                     H -2.889965732 4.753855527 0.487611703<br/>                     H -3.472025947 -2.820540973 -2.083324794<br/>                     H 1.760349811 4.033977586 0.778107963<br/>                     H 1.116833813 -3.807320054 -0.680499829<br/>                     C 4.597550610 -0.067918647 -0.094903936<br/>                     O 5.523582555 -2.154922738 -0.672105665<br/>                     O 5.663601812 1.969156990 0.486264328<br/>                     O -3.535012408 -2.979769297 1.797915677<br/>                     O -6.015954478 1.157761501 -0.921080862</p> | <p>Frequencies:</p> <p>-125.9783 52.7572 88.8357<br/>                     167.5276 206.3370 240.8827<br/>                     318.6974 327.3637 429.5670<br/>                     442.4948 452.2415 522.9465<br/>                     593.6786 641.2936 722.3882<br/>                     747.9381 762.7656 832.7146<br/>                     851.6908 901.5768 945.3055<br/>                     1001.1278 1036.6129 1068.5045<br/>                     1139.3511 1175.9742 1213.6501<br/>                     1279.3899 1295.3351 1312.0005<br/>                     1404.2574 1571.4390 1646.6193<br/>                     1681.8427 1734.4649 2897.4374<br/>                     3157.5524 3167.8195 3174.5186</p> |
|---------------------------------------------------------------------------------------------------------------------------------------------------------------------------------------------------------------------------------------------------------------------------------------------------------------------------------------------------------------------------------------------------------------------------------------------------------------------------------------------------------------------------------------------------------------------------------------------------------------------------------------------------------------------------------------------------------|--------------------------------------------------------------------------------------------------------------------------------------------------------------------------------------------------------------------------------------------------------------------------------------------------------------------------------------------------------------------------------------------------------------------------------------------------------------------------------------------------------------------------------------------------------------------------------------------------------------------------------------------------------------------------------------------------------------------------------------------------------------------------------------------------------------------------------------------------------------------------------------------------------------------------------------------------------------------------------------------------------|------------------------------------------------------------------------------------------------------------------------------------------------------------------------------------------------------------------------------------------------------------------------------------------------------------------------------------------------------------------------------------------------------------------------------------------------------------------------------------------------------------------------------------------------------------------------------------------------------------------------------------------------------------------------------------------------------------------------|

**H**

cphG1001

|                                                                                                                                                                                                                                                                                                                                                                                                                                                                                                                                                                                                                                                                                                                                   |                                                                                                                                                                                                                                                                                                                                                                                                                                                                                                                                                                                                                                                                                                                                                                                                                                                                                                                                                                                                |                                                                                                                                                                                                                                                                                                                                                                                                                                                                                                                                                                                                                                                                                                                      |
|-----------------------------------------------------------------------------------------------------------------------------------------------------------------------------------------------------------------------------------------------------------------------------------------------------------------------------------------------------------------------------------------------------------------------------------------------------------------------------------------------------------------------------------------------------------------------------------------------------------------------------------------------------------------------------------------------------------------------------------|------------------------------------------------------------------------------------------------------------------------------------------------------------------------------------------------------------------------------------------------------------------------------------------------------------------------------------------------------------------------------------------------------------------------------------------------------------------------------------------------------------------------------------------------------------------------------------------------------------------------------------------------------------------------------------------------------------------------------------------------------------------------------------------------------------------------------------------------------------------------------------------------------------------------------------------------------------------------------------------------|----------------------------------------------------------------------------------------------------------------------------------------------------------------------------------------------------------------------------------------------------------------------------------------------------------------------------------------------------------------------------------------------------------------------------------------------------------------------------------------------------------------------------------------------------------------------------------------------------------------------------------------------------------------------------------------------------------------------|
| <p>b3lyp -570.2444999<br/>                     uccsd(t) -568.7992707<br/>                     ump2(3df,2p) -569.0462414<br/>                     ump2(d,p) -568.6704656<br/>                     rmp2(d,p) -568.696461997950<br/>                     rccsd(t) -568.79996723<br/>                     -----<br/>                     ZPE 0.0964717<br/>                     Thermal 0.1057033<br/>                     S2: 0.772518<br/>                     -----<br/>                     G2M(UMP2,CC) Energy (OK): -569.0785748<br/>                     T1 Diag: 0.03114130<br/>                     -----<br/>                     G2M(UMP2,RCC) Energy (OK): -569.07927133<br/>                     T1 Diag: 0.02016173</p> | <p>Geometry:</p> <p>C 3.233884549 -1.723931009 0.000000000<br/>                     C -0.713553028 -4.348182350 0.000000000<br/>                     C 2.472555465 0.718553244 0.000000000<br/>                     C -2.522338410 -2.290983019 0.000000000<br/>                     C 0.000000000 1.762925508 0.000000000<br/>                     C -2.209261813 0.297095183 0.000000000<br/>                     H 5.228460245 -2.187187922 0.000000000<br/>                     H -4.436175557 -3.022804030 0.000000000<br/>                     H 3.970040592 2.121886546 0.000000000<br/>                     H -3.915720414 1.440789564 0.000000000<br/>                     C -0.254638706 4.688514467 0.000000000<br/>                     O 1.794174019 5.873508812 0.000000000<br/>                     O -2.477260883 5.505091585 0.000000000<br/>                     O 1.900856618 -3.945234157 0.000000000<br/>                     O -1.328581405 -6.555442942 0.000000000</p> | <p>Frequencies:</p> <p>30.7811 65.1366 97.3765<br/>                     201.3237 208.2587 296.4503<br/>                     368.5091 372.9365 475.0322<br/>                     521.3535 523.3536 563.5735<br/>                     664.7279 708.0009 761.2999<br/>                     786.8723 789.6111 812.2551<br/>                     822.4767 883.9878 966.5560<br/>                     1016.0971 1041.2273 1061.9741<br/>                     1079.0104 1245.0152 1296.0958<br/>                     1309.7858 1335.7184 1432.7211<br/>                     1451.3779 1510.8303 1592.9699<br/>                     1656.8087 1731.8514 3148.0477<br/>                     3158.9613 3173.0668 3184.7377</p> |
|-----------------------------------------------------------------------------------------------------------------------------------------------------------------------------------------------------------------------------------------------------------------------------------------------------------------------------------------------------------------------------------------------------------------------------------------------------------------------------------------------------------------------------------------------------------------------------------------------------------------------------------------------------------------------------------------------------------------------------------|------------------------------------------------------------------------------------------------------------------------------------------------------------------------------------------------------------------------------------------------------------------------------------------------------------------------------------------------------------------------------------------------------------------------------------------------------------------------------------------------------------------------------------------------------------------------------------------------------------------------------------------------------------------------------------------------------------------------------------------------------------------------------------------------------------------------------------------------------------------------------------------------------------------------------------------------------------------------------------------------|----------------------------------------------------------------------------------------------------------------------------------------------------------------------------------------------------------------------------------------------------------------------------------------------------------------------------------------------------------------------------------------------------------------------------------------------------------------------------------------------------------------------------------------------------------------------------------------------------------------------------------------------------------------------------------------------------------------------|

**H->I**

cphG1102

|                                                                                                                                                                                                                                                                                                                                                                                                 |                                                                                                                                                                                                                                                                                                                                                                                                                                                                                                                                                                                                                                                                                                |                                                                                                                                                                                                                                                                                                                                                                                                                                                          |
|-------------------------------------------------------------------------------------------------------------------------------------------------------------------------------------------------------------------------------------------------------------------------------------------------------------------------------------------------------------------------------------------------|------------------------------------------------------------------------------------------------------------------------------------------------------------------------------------------------------------------------------------------------------------------------------------------------------------------------------------------------------------------------------------------------------------------------------------------------------------------------------------------------------------------------------------------------------------------------------------------------------------------------------------------------------------------------------------------------|----------------------------------------------------------------------------------------------------------------------------------------------------------------------------------------------------------------------------------------------------------------------------------------------------------------------------------------------------------------------------------------------------------------------------------------------------------|
| <p>b3lyp -570.1759658<br/>uccsd(t) -568.7404837<br/>ump2(3df,2p) -568.9812301<br/>ump2(d,p) -568.6082082<br/>rmp2(d,p) -568.637268042466<br/>rccsd(t) -568.74058306<br/>-----<br/>ZPE 0.0943045<br/>Thermal 0.103001<br/>S2: 0.79077<br/>-----<br/>G2M(UMP2,CC) Energy (OK): -569.0192011<br/>T1 Diag: 0.03430459<br/><br/>G2M(UMP2,RCC) Energy (OK): -569.01930046<br/>T1 Diag: 0.02215067</p> | <p>Geometry:</p> <p>C -1.980338499 2.400451075 1.189229221<br/>C -2.433243492 -1.578631857 1.418502134<br/>C 0.189384573 -1.942589330 1.003624100<br/>H -2.806052443 3.584672521 2.649789099<br/>C 0.689850193 2.416906810 0.542512026<br/>H -3.344053693 -2.988157791 2.617410532<br/>H 1.790757394 4.136047363 0.334256648<br/>H 1.101649863 -3.695438818 1.550943589<br/>C 4.608195437 -0.298824283 -0.399176299<br/>O -3.692848004 1.946293193 -0.844666007<br/>O 5.316793604 -2.559201298 -0.316217322<br/>O 5.822338807 1.665334381 -0.890132817<br/>O -6.002875683 -1.591209874 -1.482730145<br/>C -4.243455617 -0.549547477 -0.487617372<br/>C 1.788009733 0.097757423 0.252524103</p> | <p>Frequencies:</p> <p>-695.8085 43.0508 75.5664<br/>138.7038 183.4592 273.3597<br/>362.0182 383.2939 471.2580<br/>492.8817 518.1966 555.5189<br/>644.1258 730.2435 743.7297<br/>765.3270 796.9015 815.5793<br/>851.7748 860.8310 920.8011<br/>963.7839 990.2422 1087.6462<br/>1110.9096 1129.2937 1193.5180<br/>1257.0355 1327.2513 1350.3030<br/>1363.8515 1411.3200 1545.3400<br/>1670.7037 1805.3927 3085.7972<br/>3137.8910 3162.5826 3175.3933</p> |
|-------------------------------------------------------------------------------------------------------------------------------------------------------------------------------------------------------------------------------------------------------------------------------------------------------------------------------------------------------------------------------------------------|------------------------------------------------------------------------------------------------------------------------------------------------------------------------------------------------------------------------------------------------------------------------------------------------------------------------------------------------------------------------------------------------------------------------------------------------------------------------------------------------------------------------------------------------------------------------------------------------------------------------------------------------------------------------------------------------|----------------------------------------------------------------------------------------------------------------------------------------------------------------------------------------------------------------------------------------------------------------------------------------------------------------------------------------------------------------------------------------------------------------------------------------------------------|

I

cphG2302

|                                                                                                                                                                                                                                                                                                                                                                                                                                                                                                                                                                                                                                                                                                        |                                                                                                                                                                                                                                                                                                                                                                                                                                                                                                                                                                                                                                                                                                                                                                                                                                                                                                                                                                                                       |                                                                                                                                                                                                                                                                                                                                                                                                                                                                                                                                                                                                                                                                                                                       |
|--------------------------------------------------------------------------------------------------------------------------------------------------------------------------------------------------------------------------------------------------------------------------------------------------------------------------------------------------------------------------------------------------------------------------------------------------------------------------------------------------------------------------------------------------------------------------------------------------------------------------------------------------------------------------------------------------------|-------------------------------------------------------------------------------------------------------------------------------------------------------------------------------------------------------------------------------------------------------------------------------------------------------------------------------------------------------------------------------------------------------------------------------------------------------------------------------------------------------------------------------------------------------------------------------------------------------------------------------------------------------------------------------------------------------------------------------------------------------------------------------------------------------------------------------------------------------------------------------------------------------------------------------------------------------------------------------------------------------|-----------------------------------------------------------------------------------------------------------------------------------------------------------------------------------------------------------------------------------------------------------------------------------------------------------------------------------------------------------------------------------------------------------------------------------------------------------------------------------------------------------------------------------------------------------------------------------------------------------------------------------------------------------------------------------------------------------------------|
| <p>b3lyp -570.2219224<br/>                     uccsd(t) -568.792399<br/>                     ump2(3df,2p) -569.0504055<br/>                     ump2(d,p) -568.6769643<br/>                     rmp2(d,p) -568.691976962411<br/>                     rccsd(t) -568.79223124<br/>                     -----<br/>                     ZPE 0.0965811<br/>                     Thermal 0.1052827<br/>                     S2: 0.77477<br/>                     -----<br/>                     G2M(UMP2,CC) Energy (OK): -569.0692591<br/>                     T1 Diag: 0.02390370<br/> <br/>                     G2M(UMP2,RCC) Energy (OK): -569.06909134<br/>                     T1 Diag: 0.01851403</p> | <p>Geometry:</p> <p>C -2.044182897 2.162440068 1.071157243<br/>                     C -2.373199334 -0.673485165 1.710300415<br/>                     C 0.182162040 -1.779231955 1.144291534<br/>                     H -2.841756928 3.589625493 2.324391488<br/>                     C 0.621648088 2.445135539 0.281860211<br/>                     H -3.199019102 -1.211635704 3.526603127<br/>                     H 1.516461757 4.190225811 -0.284991488<br/>                     H 0.673611777 -3.753786003 1.304827548<br/>                     C 4.649028639 -0.343847008 -0.349916808<br/>                     O -3.941653126 1.814847623 -1.086673784<br/>                     O 5.844758518 1.606218079 -0.947690096<br/>                     O 5.361774755 -2.593598093 -0.198232271<br/>                     O -5.722283478 -2.123271715 -1.424316821<br/>                     C -4.292134962 -0.655547885 -0.465696549<br/>                     C 1.841668506 0.103203613 0.338748527</p> | <p>Frequencies:</p> <p>43.3826 87.0221 145.6435<br/>                     178.8282 251.9938 330.8029<br/>                     393.2992 478.5034 493.9230<br/>                     517.6424 667.4349 679.7799<br/>                     693.1404 735.1142 760.1618<br/>                     770.7231 826.4981 844.1184<br/>                     863.9544 919.9286 939.7630<br/>                     1003.2939 1033.3851 1103.5356<br/>                     1122.6811 1187.6702 1209.4117<br/>                     1255.6362 1264.7839 1308.3160<br/>                     1327.3023 1339.5361 1477.7827<br/>                     1677.8344 1854.7406 3052.5154<br/>                     3090.9267 3229.5547 3233.6520</p> |
|--------------------------------------------------------------------------------------------------------------------------------------------------------------------------------------------------------------------------------------------------------------------------------------------------------------------------------------------------------------------------------------------------------------------------------------------------------------------------------------------------------------------------------------------------------------------------------------------------------------------------------------------------------------------------------------------------------|-------------------------------------------------------------------------------------------------------------------------------------------------------------------------------------------------------------------------------------------------------------------------------------------------------------------------------------------------------------------------------------------------------------------------------------------------------------------------------------------------------------------------------------------------------------------------------------------------------------------------------------------------------------------------------------------------------------------------------------------------------------------------------------------------------------------------------------------------------------------------------------------------------------------------------------------------------------------------------------------------------|-----------------------------------------------------------------------------------------------------------------------------------------------------------------------------------------------------------------------------------------------------------------------------------------------------------------------------------------------------------------------------------------------------------------------------------------------------------------------------------------------------------------------------------------------------------------------------------------------------------------------------------------------------------------------------------------------------------------------|

I->F

cphG1804

|                                                                                                                                                                                                                                                                                                                                                                             |                                                                                                                                                                                                                                                                                                                                                                                                                                                                                                                                                                                                                                                                             |                                                                                                                                                                                                                                                                                                                                                                                                                                        |
|-----------------------------------------------------------------------------------------------------------------------------------------------------------------------------------------------------------------------------------------------------------------------------------------------------------------------------------------------------------------------------|-----------------------------------------------------------------------------------------------------------------------------------------------------------------------------------------------------------------------------------------------------------------------------------------------------------------------------------------------------------------------------------------------------------------------------------------------------------------------------------------------------------------------------------------------------------------------------------------------------------------------------------------------------------------------------|----------------------------------------------------------------------------------------------------------------------------------------------------------------------------------------------------------------------------------------------------------------------------------------------------------------------------------------------------------------------------------------------------------------------------------------|
| b3lyp -570.2150536<br>uccsd(t) -568.7752063<br>ump2(3df,2p) -569.0322882<br>ump2(d,p) -568.6548752<br>rmp2(d,p) -568.674985778939<br>rccsd(t) -568.77535620<br>-----<br>ZPE 0.0953883<br>Thermal 0.1039864<br>S2: 0.770889<br>-----<br>G2M(UMP2,CC) Energy (OK): -569.0572310<br>T1 Diag: 0.02847072<br><br>G2M(UMP2,RCC) Energy (OK): -569.05738090<br>T1 Diag: 0.02285025 | Geometry:<br><br>C 4.344865880 -0.594513510 -0.435014955<br>C 2.356276837 -0.365038397 1.693085010<br>C -0.110955270 -1.635788513 1.129574346<br>C -1.879353425 0.119041408 0.332555894<br>C -0.746077105 2.548488440 0.276582206<br>C 1.795729264 2.384669972 1.062895360<br>H 3.139625010 -0.783380299 3.558858862<br>H -0.460450669 -3.643756699 1.255072949<br>H -1.733695224 4.233940846 -0.317162185<br>H 2.870038570 3.951672454 1.816765695<br>O 4.152614592 1.610090128 -1.551402793<br>O 5.753033102 -2.326564673 -0.936128752<br>C -4.662281289 -0.445234594 -0.334353024<br>O -5.960547708 1.472279960 -0.808481531<br>O -5.245696437 -2.734333557 -0.287172232 | Frequencies:<br><br>-326.3694 34.2429 85.4765<br>128.3935 181.3210 256.1918<br>338.8544 385.8170 467.3233<br>491.5636 524.9426 670.6754<br>703.1547 748.9674 769.4289<br>807.6592 844.5517 855.2368<br>901.5020 907.2035 934.5911<br>977.2760 1010.9003 1083.1294<br>1125.4835 1160.7357 1222.3561<br>1241.2036 1267.3216 1324.7950<br>1368.8209 1383.2337 1493.1376<br>1675.8569 1773.2573 3060.6215<br>3199.4109 3232.4166 3233.5806 |
|-----------------------------------------------------------------------------------------------------------------------------------------------------------------------------------------------------------------------------------------------------------------------------------------------------------------------------------------------------------------------------|-----------------------------------------------------------------------------------------------------------------------------------------------------------------------------------------------------------------------------------------------------------------------------------------------------------------------------------------------------------------------------------------------------------------------------------------------------------------------------------------------------------------------------------------------------------------------------------------------------------------------------------------------------------------------------|----------------------------------------------------------------------------------------------------------------------------------------------------------------------------------------------------------------------------------------------------------------------------------------------------------------------------------------------------------------------------------------------------------------------------------------|

**F**

cphG2401

|                                                                                                                                                                                                                                                                                                                                                                            |                                                                                                                                                                                                                                                                                                                                                                                                                                                                                                                                                |                                                                                                                                                                                                                                                                                                                                           |
|----------------------------------------------------------------------------------------------------------------------------------------------------------------------------------------------------------------------------------------------------------------------------------------------------------------------------------------------------------------------------|------------------------------------------------------------------------------------------------------------------------------------------------------------------------------------------------------------------------------------------------------------------------------------------------------------------------------------------------------------------------------------------------------------------------------------------------------------------------------------------------------------------------------------------------|-------------------------------------------------------------------------------------------------------------------------------------------------------------------------------------------------------------------------------------------------------------------------------------------------------------------------------------------|
| b3lyp -381.6084364<br>uccsd(t) -380.6001039<br>ump2(3df,2p) -380.759844<br>ump2(d,p) -380.5012353<br>rmp2(d,p) -380.516908829583<br>rccsd(t) -380.59939956<br>-----<br>ZPE 0.0804454<br>Thermal 0.0873364<br>S2: 0.759012<br>-----<br>G2M(UMP2,CC) Energy (0K): -380.7782672<br>T1 Diag: 0.03385737<br><br>G2M(UMP2,RCC) Energy (0K): -380.77756286<br>T1 Diag: 0.02295649 | Geometry:<br><br>C -4.030600645 -1.327742367 -0.389514130<br>H -5.705986480 -2.461451434 -0.708753124<br>C -4.030583638 1.327748036 0.389635072<br>H -5.705954355 2.461464662 0.708928868<br>C -1.563999707 2.107180697 0.618095403<br>H -0.886370373 3.966083505 1.122138274<br>C -1.564028053 -2.107184476 -0.618065167<br>H -0.886428954 -3.966089174 -1.122138274<br>C 0.050121206 -0.000009449 -0.000001890<br>C 2.877943294 0.000000000 -0.000032125<br>O 3.921950841 1.740046594 -1.229531410<br>O 3.922001864 -1.740042814 1.229423696 | Frequencies:<br><br>55.1231 108.2829 187.6722<br>304.7884 394.6769 548.5371<br>635.2052 686.4071 703.6211<br>720.4386 725.2154 794.4851<br>850.9573 854.4966 907.8208<br>987.8677 1051.1345 1071.3255<br>1140.9582 1228.4963 1274.6197<br>1376.8124 1391.0778 1493.4225<br>1504.3240 1519.9253 3166.4085<br>3183.1015 3220.5076 3223.7593 |
|----------------------------------------------------------------------------------------------------------------------------------------------------------------------------------------------------------------------------------------------------------------------------------------------------------------------------------------------------------------------------|------------------------------------------------------------------------------------------------------------------------------------------------------------------------------------------------------------------------------------------------------------------------------------------------------------------------------------------------------------------------------------------------------------------------------------------------------------------------------------------------------------------------------------------------|-------------------------------------------------------------------------------------------------------------------------------------------------------------------------------------------------------------------------------------------------------------------------------------------------------------------------------------------|



**H->N**

cphG1308

|                                                                                                                                                                                                                                                                                                                                                                            |                                                                                                                                                                                                                                                                                                                                                                                                                                                                                                                                        |                                                                                                                                                                                                                                                                                                                                                                                                                                       |
|----------------------------------------------------------------------------------------------------------------------------------------------------------------------------------------------------------------------------------------------------------------------------------------------------------------------------------------------------------------------------|----------------------------------------------------------------------------------------------------------------------------------------------------------------------------------------------------------------------------------------------------------------------------------------------------------------------------------------------------------------------------------------------------------------------------------------------------------------------------------------------------------------------------------------|---------------------------------------------------------------------------------------------------------------------------------------------------------------------------------------------------------------------------------------------------------------------------------------------------------------------------------------------------------------------------------------------------------------------------------------|
| b3lyp -570.191497<br>uccsd(t) -568.7490793<br>ump2(3df,2p) -568.9970139<br>ump2(d,p) -568.6267758<br>rmp2(d,p) -568.644176854445<br>rccsd(t) -568.74882197<br>-----<br>ZPE 0.0908772<br>Thermal 0.1012346<br>S2: 0.778681<br>-----<br>G2M(UMP2,CC) Energy (OK): -569.0284402<br>T1 Diag: 0.02729380<br><br>G2M(UMP2,RCC) Energy (OK): -569.02818287<br>T1 Diag: 0.02077948 | Geometry:<br><br>C -0.799446 -0.048594 0.006411<br>C -0.246953 1.189032 -0.219530<br>C 1.142042 1.666137 -0.071253<br>C -0.172876 -1.257038 0.365295<br>C 1.206691 -1.664672 0.343871<br>C 2.277659 -1.123842 -0.219841<br>H -0.972632 1.950167 -0.517755<br>H 1.771935 1.633114 -0.991535<br>H 1.454015 -2.620021 0.805876<br>O 3.253071 -0.715830 -0.719179<br>O 1.620830 2.147776 0.937391<br>H -0.871778 -2.025192 0.676336<br>C -2.379949 -0.117590 -0.106713<br>O -2.919938 0.895471 -0.598222<br>O -2.897033 -1.177251 0.309714 | Frequencies:<br><br>-269.3439 23.1333 61.9272<br>110.8669 119.9440 136.8076<br>212.2914 216.7884 308.9828<br>376.6326 405.5508 442.7906<br>485.6516 548.2139 596.6038<br>652.2693 726.3261 776.0457<br>782.7547 819.0284 836.8209<br>921.7165 974.7287 1053.0804<br>1108.3767 1178.6105 1272.2575<br>1313.9019 1368.6856 1404.0258<br>1424.0203 1485.4387 1686.9148<br>1732.7354 2146.4179 2817.7634<br>3074.5327 3113.7870 3174.0715 |
|----------------------------------------------------------------------------------------------------------------------------------------------------------------------------------------------------------------------------------------------------------------------------------------------------------------------------------------------------------------------------|----------------------------------------------------------------------------------------------------------------------------------------------------------------------------------------------------------------------------------------------------------------------------------------------------------------------------------------------------------------------------------------------------------------------------------------------------------------------------------------------------------------------------------------|---------------------------------------------------------------------------------------------------------------------------------------------------------------------------------------------------------------------------------------------------------------------------------------------------------------------------------------------------------------------------------------------------------------------------------------|

**N**

cphG2602

|                                                                                                                                                                                                                                                                                                                                                                             |                                                                                                                                                                                                                                                                                                                                                                                                                                                                                                                                                                                                                                                                               |                                                                                                                                                                                                                                                                                                                                                                                                                                      |
|-----------------------------------------------------------------------------------------------------------------------------------------------------------------------------------------------------------------------------------------------------------------------------------------------------------------------------------------------------------------------------|-------------------------------------------------------------------------------------------------------------------------------------------------------------------------------------------------------------------------------------------------------------------------------------------------------------------------------------------------------------------------------------------------------------------------------------------------------------------------------------------------------------------------------------------------------------------------------------------------------------------------------------------------------------------------------|--------------------------------------------------------------------------------------------------------------------------------------------------------------------------------------------------------------------------------------------------------------------------------------------------------------------------------------------------------------------------------------------------------------------------------------|
| b3lyp -570.2129141<br>uccsd(t) -568.7641157<br>ump2(3df,2p) -569.0039974<br>ump2(d,p) -568.6321915<br>rmp2(d,p) -568.664312675235<br>rccsd(t) -568.76455979<br>-----<br>ZPE 0.0928195<br>Thermal 0.1035071<br>S2: 0.773592<br>-----<br>G2M(UMP2,CC) Energy (OK): -569.0431021<br>T1 Diag: 0.03335314<br><br>G2M(UMP2,RCC) Energy (OK): -569.04354619<br>T1 Diag: 0.02148144 | Geometry:<br><br>C -2.066789690 -3.434316462 -0.497636700<br>C -4.103065973 -2.394615600 0.536255143<br>C -2.135819496 2.883652157 -0.975850795<br>C 0.466274805 -2.467765009 -0.759437469<br>C 1.462536532 -0.117951036 -0.131549505<br>C 0.200212704 2.175293985 0.201592204<br>H -2.413257749 -5.382816855 -1.056360687<br>H 1.218986738 3.648086061 1.201699524<br>H 1.852041213 -3.847329336 -1.370346243<br>O -5.983557013 -1.629185810 1.384744066<br>O -3.189651730 4.952367478 -0.736413045<br>C 4.425213256 -0.103441719 0.278407682<br>O 5.593094241 -1.582159975 -1.144051538<br>O 5.184646945 1.367757318 1.943452935<br>H -2.985398791 1.466701488 -2.267529628 | Frequencies:<br><br>41.4584 64.0570 85.1385<br>132.4686 148.6847 197.4325<br>227.4274 249.7834 325.2887<br>364.8011 387.6002 448.6084<br>507.6119 576.1027 603.7948<br>689.8085 771.0415 778.7668<br>855.4751 877.5501 887.7193<br>942.3401 1003.4619 1057.0091<br>1169.5069 1182.9269 1293.2668<br>1299.1039 1381.1076 1400.4241<br>1456.5873 1491.8865 1632.1709<br>1695.5380 2156.8751 2880.2857<br>3131.2803 3171.1346 3177.5261 |
|-----------------------------------------------------------------------------------------------------------------------------------------------------------------------------------------------------------------------------------------------------------------------------------------------------------------------------------------------------------------------------|-------------------------------------------------------------------------------------------------------------------------------------------------------------------------------------------------------------------------------------------------------------------------------------------------------------------------------------------------------------------------------------------------------------------------------------------------------------------------------------------------------------------------------------------------------------------------------------------------------------------------------------------------------------------------------|--------------------------------------------------------------------------------------------------------------------------------------------------------------------------------------------------------------------------------------------------------------------------------------------------------------------------------------------------------------------------------------------------------------------------------------|

**N->R**

cphG2801

|                                                                                                                                                                                                                                                                                                                                                                            |                                                                                                                                                                                                                                                                                                                                                                                                                                                                                                                                                                                                                                                                                |                                                                                                                                                                                                                                                                                                                                                                                                                                        |
|----------------------------------------------------------------------------------------------------------------------------------------------------------------------------------------------------------------------------------------------------------------------------------------------------------------------------------------------------------------------------|--------------------------------------------------------------------------------------------------------------------------------------------------------------------------------------------------------------------------------------------------------------------------------------------------------------------------------------------------------------------------------------------------------------------------------------------------------------------------------------------------------------------------------------------------------------------------------------------------------------------------------------------------------------------------------|----------------------------------------------------------------------------------------------------------------------------------------------------------------------------------------------------------------------------------------------------------------------------------------------------------------------------------------------------------------------------------------------------------------------------------------|
| b3lyp -570.2053716<br>uccsd(t) -568.7544729<br>ump2(3df,2p) -568.993091<br>ump2(d,p) -568.6194171<br>rmp2(d,p) -568.661845045606<br>rccsd(t) -568.75704972<br>-----<br>ZPE 0.0925064<br>Thermal 0.1023639<br>S2: 0.758232<br>-----<br>G2M(UMP2,CC) Energy (OK): -569.0356404<br>T1 Diag: 0.04067068<br><br>G2M(UMP2,RCC) Energy (OK): -569.03821722<br>T1 Diag: 0.02212112 | Geometry:<br><br>C -1.810979354 -3.351578582 -0.707029694<br>C -3.435958634 -1.971173328 0.749346331<br>C -2.267729939 2.476839474 -1.277851707<br>C 0.700496910 -2.537514801 -1.155660126<br>C 1.463129906 -0.226657532 -0.186727618<br>C -0.400911068 1.555569639 0.509345443<br>H -2.497135133 -5.191414054 -1.309546194<br>H -0.020108576 2.788778456 2.105844660<br>H 2.059217558 -3.793458913 -2.029856883<br>O -5.386337415 -1.540268527 1.718361986<br>O -3.691706609 4.272217249 -0.918452253<br>C 4.311304344 0.226784143 0.368188570<br>O 5.684891467 -0.412623591 -1.446417168<br>O 4.818843209 1.142254409 2.465593714<br>H -2.303600721 1.469849772 -3.116802787 | Frequencies:<br><br>-287.1852 57.1833 80.3819<br>103.9552 153.1407 172.0508<br>236.7609 278.5286 312.7987<br>349.7228 393.9596 472.7603<br>506.5778 595.6348 646.2871<br>691.3488 757.8661 783.2226<br>877.2199 895.5540 919.6986<br>960.9710 1004.9887 1062.3268<br>1098.7796 1148.1946 1271.3288<br>1298.7075 1372.7700 1412.0694<br>1453.7571 1483.2954 1670.1966<br>1684.1393 2015.1646 2884.4068<br>3140.0650 3160.8736 3198.9241 |
|----------------------------------------------------------------------------------------------------------------------------------------------------------------------------------------------------------------------------------------------------------------------------------------------------------------------------------------------------------------------------|--------------------------------------------------------------------------------------------------------------------------------------------------------------------------------------------------------------------------------------------------------------------------------------------------------------------------------------------------------------------------------------------------------------------------------------------------------------------------------------------------------------------------------------------------------------------------------------------------------------------------------------------------------------------------------|----------------------------------------------------------------------------------------------------------------------------------------------------------------------------------------------------------------------------------------------------------------------------------------------------------------------------------------------------------------------------------------------------------------------------------------|

**R**

cphG2901

|                                                                                                                                                                                                                                                                                                                                                                                                   |                                                                                                                                                                                                                                                                                                                                                                                                                                                                                                                                                                                                                                                                                                 |                                                                                                                                                                                                                                                                                                                                                                                                                                                          |
|---------------------------------------------------------------------------------------------------------------------------------------------------------------------------------------------------------------------------------------------------------------------------------------------------------------------------------------------------------------------------------------------------|-------------------------------------------------------------------------------------------------------------------------------------------------------------------------------------------------------------------------------------------------------------------------------------------------------------------------------------------------------------------------------------------------------------------------------------------------------------------------------------------------------------------------------------------------------------------------------------------------------------------------------------------------------------------------------------------------|----------------------------------------------------------------------------------------------------------------------------------------------------------------------------------------------------------------------------------------------------------------------------------------------------------------------------------------------------------------------------------------------------------------------------------------------------------|
| <p>b3lyp -570.2448417<br/>uccsd(t) -568.8081462<br/>ump2(3df,2p) -569.0575084<br/>ump2(d,p) -568.6858936<br/>rmp2(d,p) -568.706038431408<br/>rccsd(t) -568.80797073<br/>-----<br/>ZPE 0.0951536<br/>Thermal 0.1048374<br/>S2: 0.767384<br/>-----<br/>G2M(UMP2,CC) Energy (OK): -569.0846074<br/>T1 Diag: 0.02806984<br/><br/>G2M(UMP2,RCC) Energy (OK): -569.08443193<br/>T1 Diag: 0.02101592</p> | <p>Geometry:</p> <p>C 2.097148141 -3.636828963 0.637731547<br/>C 3.271971979 -1.321302180 -0.231054924<br/>C 1.312732272 2.970092009 0.743401253<br/>C 1.059045988 0.558901621 -0.797577811<br/>C -1.258610516 -0.967628596 -0.160862937<br/>C -0.527343195 -3.361645154 0.642771446<br/>H 3.166462900 -5.303484262 1.151364778<br/>H 1.140888137 1.090893542 -2.794848257<br/>H -1.882344861 -4.796151378 1.186067709<br/>O 5.525013077 -0.873964321 -0.520494827<br/>O 2.178582109 4.918010367 -0.074065926<br/>C -3.901186531 0.093471524 -0.143859181<br/>O -5.634806166 -1.366923949 -0.807755876<br/>O -4.004102905 2.348668799 0.598759725<br/>H 0.734956066 2.792057131 2.742593550</p> | <p>Frequencies:</p> <p>47.4338 60.6602 94.9834<br/>148.5156 176.0589 237.3236<br/>295.9323 344.7600 362.7418<br/>453.3097 497.2948 598.3392<br/>642.4831 699.3303 753.0214<br/>760.6301 777.1801 800.0368<br/>910.8847 949.6474 994.5016<br/>1037.7823 1056.3344 1115.8602<br/>1163.3425 1194.2172 1243.4723<br/>1278.7140 1343.3385 1410.2532<br/>1418.4501 1452.1079 1606.6987<br/>1673.9941 1772.9020 2941.1879<br/>3056.9646 3189.9691 3206.9335</p> |
|---------------------------------------------------------------------------------------------------------------------------------------------------------------------------------------------------------------------------------------------------------------------------------------------------------------------------------------------------------------------------------------------------|-------------------------------------------------------------------------------------------------------------------------------------------------------------------------------------------------------------------------------------------------------------------------------------------------------------------------------------------------------------------------------------------------------------------------------------------------------------------------------------------------------------------------------------------------------------------------------------------------------------------------------------------------------------------------------------------------|----------------------------------------------------------------------------------------------------------------------------------------------------------------------------------------------------------------------------------------------------------------------------------------------------------------------------------------------------------------------------------------------------------------------------------------------------------|

**R->ID\_M**

cphG3001

|                                                                                                                                                                                                                                                                                                                                                                                                   |                                                                                                                                                                                                                                                                                                                                                                                                                                                                                                                                                                                                                                                                                                    |                                                                                                                                                                                                                                                                                                                                                                                                                                                        |
|---------------------------------------------------------------------------------------------------------------------------------------------------------------------------------------------------------------------------------------------------------------------------------------------------------------------------------------------------------------------------------------------------|----------------------------------------------------------------------------------------------------------------------------------------------------------------------------------------------------------------------------------------------------------------------------------------------------------------------------------------------------------------------------------------------------------------------------------------------------------------------------------------------------------------------------------------------------------------------------------------------------------------------------------------------------------------------------------------------------|--------------------------------------------------------------------------------------------------------------------------------------------------------------------------------------------------------------------------------------------------------------------------------------------------------------------------------------------------------------------------------------------------------------------------------------------------------|
| <p>b3lyp -570.1799079<br/>uccsd(t) -568.7437381<br/>ump2(3df,2p) -569.0013657<br/>ump2(d,p) -568.6281192<br/>rmp2(d,p) -568.639082723549<br/>rccsd(t) -568.74353752<br/>-----<br/>ZPE 0.0905322<br/>Thermal 0.1008521<br/>S2: 0.771648<br/>-----<br/>G2M(UMP2,CC) Energy (OK): -569.0264524<br/>T1 Diag: 0.03004433<br/><br/>G2M(UMP2,RCC) Energy (OK): -569.02625182<br/>T1 Diag: 0.02194093</p> | <p>Geometry:</p> <p>C 2.344435813 -2.413607348 2.032086760<br/>C 3.122447399 -1.537947943 -0.565434404<br/>C 1.650883646 3.372263525 0.723472201<br/>C 0.751929587 -0.596261507 -1.764448627<br/>C -1.218795876 -1.103594392 -0.181254972<br/>C -0.182226291 -2.189695588 2.196693244<br/>H 3.658868838 -3.157184345 3.408385640<br/>H 0.656419048 0.143420765 -3.664392508<br/>H -1.373059889 -2.656966279 3.791977368<br/>O 5.225737150 -1.722362537 -1.497730791<br/>O 2.253821555 5.324951551 -0.166012441<br/>C -3.940893456 -0.242803352 -0.335528434<br/>O -4.347619211 1.391256062 1.362902611<br/>O -5.386031279 -1.120069024 -1.955059633<br/>H -0.076188088 2.950393504 1.877713142</p> | <p>Frequencies:</p> <p>-202.8622 41.6923 60.4734<br/>90.2729 95.7988 170.8901<br/>185.2302 222.8084 261.8212<br/>360.3414 372.7839 478.7611<br/>564.3911 629.1684 670.6229<br/>709.8881 734.3900 755.6378<br/>786.1411 840.9262 880.1649<br/>883.7987 944.9568 1064.7294<br/>1081.4267 1095.2804 1146.1762<br/>1233.9091 1329.0932 1353.1493<br/>1503.8421 1601.8362 1651.5108<br/>1725.4231 1857.0325 2706.1261<br/>3197.8727 3221.8596 3228.8290</p> |
|---------------------------------------------------------------------------------------------------------------------------------------------------------------------------------------------------------------------------------------------------------------------------------------------------------------------------------------------------------------------------------------------------|----------------------------------------------------------------------------------------------------------------------------------------------------------------------------------------------------------------------------------------------------------------------------------------------------------------------------------------------------------------------------------------------------------------------------------------------------------------------------------------------------------------------------------------------------------------------------------------------------------------------------------------------------------------------------------------------------|--------------------------------------------------------------------------------------------------------------------------------------------------------------------------------------------------------------------------------------------------------------------------------------------------------------------------------------------------------------------------------------------------------------------------------------------------------|

**M**

cphG2501

|                                                                                                                                                                                                                                                                                                                                                                                              |                                                                                                                                                                                                                                                                                                                                                                                                                                                                                                                                                                 |                                                                                                                                                                                                                                                                                                                                                          |
|----------------------------------------------------------------------------------------------------------------------------------------------------------------------------------------------------------------------------------------------------------------------------------------------------------------------------------------------------------------------------------------------|-----------------------------------------------------------------------------------------------------------------------------------------------------------------------------------------------------------------------------------------------------------------------------------------------------------------------------------------------------------------------------------------------------------------------------------------------------------------------------------------------------------------------------------------------------------------|----------------------------------------------------------------------------------------------------------------------------------------------------------------------------------------------------------------------------------------------------------------------------------------------------------------------------------------------------------|
| <p>b3lyp -456.2806091<br/>uccsd(t) -455.1202063<br/>ump2(3df,2p) -455.3375346<br/>ump2(d,p) -455.0341946<br/>rmp2(d,p) -455.034193773948<br/>rccsd(t) -455.12020827<br/>-----<br/>ZPE 0.0751756<br/>Thermal 0.0826204<br/>S2: 0.0<br/>-----<br/>G2M(UMP2,CC) Energy (OK): -455.3483707<br/>T1 Diag: 0.01947431<br/><br/>G2M(UMP2,RCC) Energy (OK): -455.34837267<br/>T1 Diag: 0.01947392</p> | <p>Geometry:</p> <p>C -3.577939427 -0.518482269 0.129442461<br/>C -3.027484882 2.233514558 -0.429419476<br/>H -4.483409262 3.650709001 -0.646634047<br/>C -0.514665022 2.479071241 -0.565201968<br/>H 0.585204719 4.169990624 -0.890739420<br/>C -1.079352985 -1.787093215 0.290828852<br/>H -0.823270528 -3.778050086 0.655413714<br/>C 0.736445171 -0.050092860 -0.145807489<br/>O -5.675737634 -1.455412264 0.355200483<br/>C 3.594527443 -0.280168907 0.025541538<br/>O 4.623653397 -2.185496617 -0.893970851<br/>O 4.543619716 1.578015806 1.169978581</p> | <p>Frequencies:</p> <p>45.7404 112.3297 170.6534<br/>245.4218 356.6388 385.4886<br/>476.3147 597.0076 663.8766<br/>686.3860 733.8895 740.0496<br/>803.2480 851.6696 861.8268<br/>877.5053 948.3666 1051.5714<br/>1084.0097 1143.1797 1236.6498<br/>1314.6099 1354.0309 1573.2723<br/>1631.9526 1653.8984 1733.9729<br/>3202.3437 3228.4136 3233.9718</p> |
|----------------------------------------------------------------------------------------------------------------------------------------------------------------------------------------------------------------------------------------------------------------------------------------------------------------------------------------------------------------------------------------------|-----------------------------------------------------------------------------------------------------------------------------------------------------------------------------------------------------------------------------------------------------------------------------------------------------------------------------------------------------------------------------------------------------------------------------------------------------------------------------------------------------------------------------------------------------------------|----------------------------------------------------------------------------------------------------------------------------------------------------------------------------------------------------------------------------------------------------------------------------------------------------------------------------------------------------------|

**S**

cphG7001

|                                                                                                                                                                                                                                                                                                                                                                                                |                                                                                                                                                                                                                                                                                                                                                                                                                                                                                                                                                                                                                                                                                              |                                                                                                                                                                                                                                                                                                                                                                                                                                                          |
|------------------------------------------------------------------------------------------------------------------------------------------------------------------------------------------------------------------------------------------------------------------------------------------------------------------------------------------------------------------------------------------------|----------------------------------------------------------------------------------------------------------------------------------------------------------------------------------------------------------------------------------------------------------------------------------------------------------------------------------------------------------------------------------------------------------------------------------------------------------------------------------------------------------------------------------------------------------------------------------------------------------------------------------------------------------------------------------------------|----------------------------------------------------------------------------------------------------------------------------------------------------------------------------------------------------------------------------------------------------------------------------------------------------------------------------------------------------------------------------------------------------------------------------------------------------------|
| <p>b3lyp -570.253237<br/>uccsd(t) -568.8095898<br/>ump2(3df,2p) -569.0501043<br/>ump2(d,p) -568.677084<br/>rmp2(d,p) -568.708860904401<br/>rccsd(t) -568.80994575<br/>-----<br/>ZPE 0.0956333<br/>Thermal 0.1052237<br/>S2: 0.767636<br/>-----<br/>G2M(UMP2,CC) Energy (OK): -569.0869768<br/>T1 Diag: 0.03263271<br/><br/>G2M(UMP2,RCC) Energy (OK): -569.0555558<br/>T1 Diag: 0.02019927</p> | <p>Geometry:</p> <p>C -2.729140589 1.679520555 -0.251004763<br/>C -3.781619779 -1.003837639 0.191982947<br/>C -1.945299197 -2.996897775 0.255498532<br/>C 0.662466172 -2.598218473 0.095782659<br/>C 1.746464104 -0.222564385 -0.004658175<br/>C 0.096177611 2.073439637 0.059443225<br/>O -6.084734840 -1.341603508 0.391762904<br/>O -4.128575386 3.408300602 -0.809288444<br/>H -2.691467009 -4.902272728 0.416866026<br/>H 1.930625474 -4.209659755 0.058902764<br/>H 0.729515545 3.496146411 -1.303181596<br/>H 0.383546375 2.984370780 1.906949095<br/>C 4.598943338 0.119549744 0.003968425<br/>O 5.784922230 -1.311898903 -1.459760524<br/>O 5.398365522 1.785885680 1.479084864</p> | <p>Frequencies:</p> <p>36.2780 48.7694 72.0302<br/>166.7066 206.5960 307.4840<br/>336.2120 349.9535 377.7232<br/>458.6231 516.1975 573.0495<br/>594.9442 632.2420 681.3524<br/>766.8907 773.5642 836.9106<br/>911.9455 922.6345 964.3767<br/>1053.2605 1115.1306 1119.7131<br/>1165.9702 1262.8965 1309.4598<br/>1343.3649 1355.4274 1396.6075<br/>1461.8849 1521.3420 1599.9848<br/>1609.5225 1755.3381 2998.5074<br/>3055.2421 3150.1682 3169.8568</p> |
|------------------------------------------------------------------------------------------------------------------------------------------------------------------------------------------------------------------------------------------------------------------------------------------------------------------------------------------------------------------------------------------------|----------------------------------------------------------------------------------------------------------------------------------------------------------------------------------------------------------------------------------------------------------------------------------------------------------------------------------------------------------------------------------------------------------------------------------------------------------------------------------------------------------------------------------------------------------------------------------------------------------------------------------------------------------------------------------------------|----------------------------------------------------------------------------------------------------------------------------------------------------------------------------------------------------------------------------------------------------------------------------------------------------------------------------------------------------------------------------------------------------------------------------------------------------------|

**X**

cphG7202

|                                                                                                                                                                                                                                                                                                                                                                                                                                                                                                                                                                                                                                                                                |                                                                                                                                                                                                                                                                                                                                                                                                                                                                                                                                                                                                                                                                                                                                                                                                                                                                                                                                          |                                                                                                                                                                                                                                                                                                                                                                                                                                                                                                                                                                                                                                                                |
|--------------------------------------------------------------------------------------------------------------------------------------------------------------------------------------------------------------------------------------------------------------------------------------------------------------------------------------------------------------------------------------------------------------------------------------------------------------------------------------------------------------------------------------------------------------------------------------------------------------------------------------------------------------------------------|------------------------------------------------------------------------------------------------------------------------------------------------------------------------------------------------------------------------------------------------------------------------------------------------------------------------------------------------------------------------------------------------------------------------------------------------------------------------------------------------------------------------------------------------------------------------------------------------------------------------------------------------------------------------------------------------------------------------------------------------------------------------------------------------------------------------------------------------------------------------------------------------------------------------------------------|----------------------------------------------------------------------------------------------------------------------------------------------------------------------------------------------------------------------------------------------------------------------------------------------------------------------------------------------------------------------------------------------------------------------------------------------------------------------------------------------------------------------------------------------------------------------------------------------------------------------------------------------------------------|
| <p>b3lyp -569.6598047<br/>                     uccsd(t) 0.0<br/>                     ump2(3df,2p) -568.5014994<br/>                     ump2(d,p) 0.0<br/>                     rmp2(d,p) -568.129917526239<br/>                     rccsd(t) -568.22965603<br/>                     -----<br/>                     ZPE 0.0856813<br/>                     Thermal 0.0947747<br/>                     S2: 0.0<br/>                     -----<br/>                     G2M(UMP2,CC) Energy (OK): -568.4158181<br/>                     T1 Diag: 0.0<br/> <br/>                     G2M(UMP2,RCC) Energy (OK): -568.515556603761<br/>                     T1 Diag: 0.01941167</p> | <p>Geometry:</p> <p>C 3.730428988 -0.969641155 -0.075589045<br/>                     C 2.614256579 1.765994423 0.176375699<br/>                     C -0.123801628 2.012616911 0.110902357<br/>                     C -1.657127301 -0.024008970 -0.149399858<br/>                     C -0.590938148 -2.574836892 -0.368065738<br/>                     C 1.915498216 -3.038048451 -0.370537500<br/>                     O 4.069413730 3.547737824 0.376875641<br/>                     O 6.010122783 -1.295998747 -0.018814113<br/>                     H -0.918758389 3.897754788 0.223996797<br/>                     H -1.956735820 -4.094000957 -0.514494947<br/>                     H 2.685682557 -4.929040699 -0.566581468<br/>                     C -4.548977089 0.170963523 0.008794785<br/>                     O -5.468863645 -1.624841330 1.266443431<br/>                     O -5.591452069 2.006482860 -1.016729350</p> | <p>Frequencies:</p> <p>42.5088 62.6341 115.1196<br/>                     177.6450 248.8784 311.5551<br/>                     353.7338 356.6740 467.6781<br/>                     478.2853 551.3722 596.8519<br/>                     618.3123 688.9632 755.8636<br/>                     776.5646 791.3292 847.7095<br/>                     896.1905 934.9384 994.2782<br/>                     1064.5737 1140.1894 1170.2150<br/>                     1263.2280 1299.0257 1342.4130<br/>                     1407.8510 1594.5751 1643.7140<br/>                     1664.2988 1693.9051 1727.4011<br/>                     3158.1707 3181.5925 3191.5035</p> |
|--------------------------------------------------------------------------------------------------------------------------------------------------------------------------------------------------------------------------------------------------------------------------------------------------------------------------------------------------------------------------------------------------------------------------------------------------------------------------------------------------------------------------------------------------------------------------------------------------------------------------------------------------------------------------------|------------------------------------------------------------------------------------------------------------------------------------------------------------------------------------------------------------------------------------------------------------------------------------------------------------------------------------------------------------------------------------------------------------------------------------------------------------------------------------------------------------------------------------------------------------------------------------------------------------------------------------------------------------------------------------------------------------------------------------------------------------------------------------------------------------------------------------------------------------------------------------------------------------------------------------------|----------------------------------------------------------------------------------------------------------------------------------------------------------------------------------------------------------------------------------------------------------------------------------------------------------------------------------------------------------------------------------------------------------------------------------------------------------------------------------------------------------------------------------------------------------------------------------------------------------------------------------------------------------------|



**T->S**

cphG6901

|                                                                                                                                                                                                                                                                                                        |                                                                                                                                                                                                                                                                                                                                                                                                                                                                                                                                                            |                                                                                                                                                                                                                                                                                                                                                                                                                                                            |
|--------------------------------------------------------------------------------------------------------------------------------------------------------------------------------------------------------------------------------------------------------------------------------------------------------|------------------------------------------------------------------------------------------------------------------------------------------------------------------------------------------------------------------------------------------------------------------------------------------------------------------------------------------------------------------------------------------------------------------------------------------------------------------------------------------------------------------------------------------------------------|------------------------------------------------------------------------------------------------------------------------------------------------------------------------------------------------------------------------------------------------------------------------------------------------------------------------------------------------------------------------------------------------------------------------------------------------------------|
| <p>b3lyp -570.1845533<br/>ccsd(t) -568.7335453<br/>mp2(3df,2p) -568.9680522<br/>mp2(d,p) -568.5935986<br/>-----<br/>ZPE 0.0912173<br/>Thermal 0.1002482<br/>S2: 0.775413<br/>-----<br/>G2M(MP2,cc) Energy (0K): -569.0167816<br/>G2M(MP2,cc) Enthalpy (298K): -569.0077507<br/>T1 Diag: 0.03892981</p> | <p>Geometry:</p> <p>C -1.416504 0.882606 0.167316<br/>C -1.984742 -0.538920 -0.038810<br/>C -1.004262 -1.619336 -0.101837<br/>C 0.338835 -1.396054 -0.095083<br/>C 0.913788 -0.083181 -0.020760<br/>C 0.086690 1.010579 0.073825<br/>O -3.191735 -0.727449 -0.122900<br/>O -2.175385 1.908522 0.057201<br/>H -1.408443 -2.620587 -0.216702<br/>H 1.041691 -2.220346 -0.147182<br/>H 0.489554 2.014578 0.140453<br/>H -0.938760 0.806210 1.273673<br/>C 2.442342 0.103355 -0.035156<br/>O 3.061605 -0.898395 0.402620<br/>O 2.875400 1.200553 -0.430322</p> | <p>Frequencies:</p> <p>-975.6550 44.7602 78.8512<br/>152.3863 177.3019 274.1431<br/>315.4813 333.4228 380.9070<br/>465.0080 474.7338 537.2115<br/>595.4887 609.2575 678.7737<br/>750.9794 761.5359 798.6048<br/>857.3150 903.6176 937.6394<br/>1006.9154 1020.8720 1037.7057<br/>1077.8514 1133.1414 1211.7099<br/>1266.1408 1306.9339 1386.6103<br/>1418.4900 1494.6470 1591.8800<br/>1623.7873 1683.0019 2118.3930<br/>3154.3842 3182.9068 3196.9964</p> |
|--------------------------------------------------------------------------------------------------------------------------------------------------------------------------------------------------------------------------------------------------------------------------------------------------------|------------------------------------------------------------------------------------------------------------------------------------------------------------------------------------------------------------------------------------------------------------------------------------------------------------------------------------------------------------------------------------------------------------------------------------------------------------------------------------------------------------------------------------------------------------|------------------------------------------------------------------------------------------------------------------------------------------------------------------------------------------------------------------------------------------------------------------------------------------------------------------------------------------------------------------------------------------------------------------------------------------------------------|

**S->X**

cphG7101

|                                                                                                                                                                                                                                                                                                                                                                                |                                                                                                                                                                                                                                                                                                                                                                                                                                                                                                                                                                                                                                                                           |                                                                                                                                                                                                                                                                                                                                                                                                                                      |
|--------------------------------------------------------------------------------------------------------------------------------------------------------------------------------------------------------------------------------------------------------------------------------------------------------------------------------------------------------------------------------|---------------------------------------------------------------------------------------------------------------------------------------------------------------------------------------------------------------------------------------------------------------------------------------------------------------------------------------------------------------------------------------------------------------------------------------------------------------------------------------------------------------------------------------------------------------------------------------------------------------------------------------------------------------------------|--------------------------------------------------------------------------------------------------------------------------------------------------------------------------------------------------------------------------------------------------------------------------------------------------------------------------------------------------------------------------------------------------------------------------------------|
| b3lyp -570.1620989<br>uccsd(t) -568.7278635<br>ump2(3df,2p) -568.9919723<br>ump2(d,p) -568.617894<br>rmp2(d,p) -568.628033006196<br>rccsd(t) -568.72820915<br>-----<br>ZPE 0.0863241<br>Thermal 0.0966848<br>S2: 0.762037<br>-----<br>G2M(UMP2,CC) Energy (OK): -569.0156177<br>T1 Diag: 0.02659346<br><br>G2M(UMP2,RCC) Energy (OK): -569.005824343804<br>T1 Diag: 0.01951257 | Geometry:<br><br>C -2.612578502 1.718180573 -0.303565606<br>C -3.727601957 -1.001210919 0.077533573<br>C -1.909598491 -3.063006064 0.396209429<br>C 0.598716261 -2.601926116 0.384332501<br>C 1.665281469 -0.060603517 0.129393328<br>C 0.125602537 1.983101279 -0.119413684<br>O -6.008450375 -1.321956026 0.090262769<br>O -4.054545365 3.468100985 -0.724853591<br>H -2.679285834 -4.949052898 0.636129059<br>H 1.961155889 -4.121898984 0.551777354<br>H 0.922450914 3.860617890 -0.312260236<br>H -0.328271885 3.038662612 4.397838683<br>C 4.550980199 0.131094081 -0.067019137<br>O 5.446256851 -1.664408416 -1.343655751<br>O 5.614132562 1.960496375 0.945959107 | Frequencies:<br><br>-198.0681 43.3296 64.5617<br>107.2716 134.3819 171.9030<br>186.4815 254.5281 312.4722<br>353.4795 353.8471 467.6198<br>475.9272 557.9852 596.6783<br>614.5143 687.5461 755.4581<br>775.7479 794.2844 847.7636<br>891.4898 935.9114 995.2723<br>1065.1194 1139.1241 1168.8365<br>1261.3253 1296.6134 1342.0167<br>1409.5434 1573.3298 1637.6079<br>1659.9592 1697.4061 1728.5403<br>3159.0366 3183.3537 3191.6220 |
|--------------------------------------------------------------------------------------------------------------------------------------------------------------------------------------------------------------------------------------------------------------------------------------------------------------------------------------------------------------------------------|---------------------------------------------------------------------------------------------------------------------------------------------------------------------------------------------------------------------------------------------------------------------------------------------------------------------------------------------------------------------------------------------------------------------------------------------------------------------------------------------------------------------------------------------------------------------------------------------------------------------------------------------------------------------------|--------------------------------------------------------------------------------------------------------------------------------------------------------------------------------------------------------------------------------------------------------------------------------------------------------------------------------------------------------------------------------------------------------------------------------------|
