# Supplementary material for: Isolation and characterization of charge-tagged phenylperoxyl radicals in the gas phase: direct evidence for products and pathways in low temperature benzene oxidation
Source: Royal Society of Chemistry journal article supplement (doi:10.1039/c2cp43507a), 2012-01-01
Supplement: c2cp43507a_3.pdf [file c2cp43507a_3.pdf]

**N->R**

pyG\_2x3

|                                                                                                                                                                                                                                                                                                                                                                            |                                                                                                                                                                                                                                                                                                                                                                                                                                                                                                                                                                                          |                                                                                                                                                                                                                                                                                                                                                                              |
|----------------------------------------------------------------------------------------------------------------------------------------------------------------------------------------------------------------------------------------------------------------------------------------------------------------------------------------------------------------------------|------------------------------------------------------------------------------------------------------------------------------------------------------------------------------------------------------------------------------------------------------------------------------------------------------------------------------------------------------------------------------------------------------------------------------------------------------------------------------------------------------------------------------------------------------------------------------------------|------------------------------------------------------------------------------------------------------------------------------------------------------------------------------------------------------------------------------------------------------------------------------------------------------------------------------------------------------------------------------|
| b3lyp -382.0976024<br>uccsd(t) -381.104824<br>ump2(3df,2p) -381.2207126<br>ump2(d,p) -380.9849578<br>rmp2(d,p) -381.028052230893<br>rccsd(t) -381.10820220<br>-----<br>ZPE 0.0912803<br>Thermal 0.0983205<br>S2: 0.755568<br>-----<br>G2M(UMP2,CC) Energy (OK): -381.2492985<br>T1 Diag: 0.04554452<br><br>G2M(UMP2,RCC) Energy (OK): -381.25267670<br>T1 Diag: 0.01852322 | Geometry:<br><br>C 2.930167765 1.050266320 -0.950454765<br>C 0.997233046 2.268353549 0.307581274<br>C -2.542469663 -0.939651201 -0.902028643<br>C -0.883297678 -1.643351197 1.217868020<br>C 1.479443912 -2.832593646 0.822871795<br>C 3.291143251 -1.559430350 -0.571861363<br>H 4.201809833 2.231003112 -2.040834302<br>H -1.669455874 -1.074802524 -2.801033330<br>H -1.907559477 -1.970515703 2.968735186<br>H 5.027671175 -2.447792494 -1.193647401<br>O -0.163918624 4.053328381 0.871515236<br>O -4.741141450 -0.329985867 -0.653393597<br>H 1.954679798 -4.586199025 1.777960169 | Frequencies:<br><br>-373.4753 106.0546 136.1390<br>242.0314 283.6985 328.4790<br>416.7462 467.1951 532.4349<br>626.2922 683.6159 782.5181<br>798.7200 899.7018 931.4487<br>949.0227 1006.3663 1033.8613<br>1078.8250 1124.8552 1175.3070<br>1334.0485 1376.1738 1425.2687<br>1482.4458 1512.1487 1718.8911<br>2034.3150 2906.3365 3144.6829<br>3156.6156 3175.8383 3197.3585 |
|----------------------------------------------------------------------------------------------------------------------------------------------------------------------------------------------------------------------------------------------------------------------------------------------------------------------------------------------------------------------------|------------------------------------------------------------------------------------------------------------------------------------------------------------------------------------------------------------------------------------------------------------------------------------------------------------------------------------------------------------------------------------------------------------------------------------------------------------------------------------------------------------------------------------------------------------------------------------------|------------------------------------------------------------------------------------------------------------------------------------------------------------------------------------------------------------------------------------------------------------------------------------------------------------------------------------------------------------------------------|

**R**

pyG\_2x4

|                                                                                                                                                                                                                                                                                                                                                                            |                                                                                                                                                                                                                                                                                                                                                                                                                                                                                                                                                                                        |                                                                                                                                                                                                                                                                                                                                                                            |
|----------------------------------------------------------------------------------------------------------------------------------------------------------------------------------------------------------------------------------------------------------------------------------------------------------------------------------------------------------------------------|----------------------------------------------------------------------------------------------------------------------------------------------------------------------------------------------------------------------------------------------------------------------------------------------------------------------------------------------------------------------------------------------------------------------------------------------------------------------------------------------------------------------------------------------------------------------------------------|----------------------------------------------------------------------------------------------------------------------------------------------------------------------------------------------------------------------------------------------------------------------------------------------------------------------------------------------------------------------------|
| b3lyp -382.1357666<br>uccsd(t) -381.155967<br>ump2(3df,2p) -381.2800447<br>ump2(d,p) -381.0470849<br>rmp2(d,p) -381.067997498489<br>rccsd(t) -381.15626718<br>-----<br>ZPE 0.0932138<br>Thermal 0.1002012<br>S2: 0.775577<br>-----<br>G2M(UMP2,CC) Energy (OK): -381.2957130<br>T1 Diag: 0.02790907<br><br>G2M(UMP2,RCC) Energy (OK): -381.29601318<br>T1 Diag: 0.01719956 | Geometry:<br><br>C -3.368956504 -0.457302385 -0.746046869<br>C -1.609706513 1.480810184 0.099915490<br>C 3.172474119 0.929293612 -0.053297836<br>C 0.724889495 0.044094870 1.171705791<br>C 0.042396006 -2.672896670 0.786898969<br>C -2.325154937 -2.850468566 -0.309556038<br>H -5.187700742 -0.038304749 -1.576532371<br>H 0.875632949 0.550917528 3.182771237<br>H -3.243735692 -4.616908964 -0.780472010<br>O -1.832422076 3.770151031 0.022455616<br>O 4.712094470 -0.457752140 -0.992678806<br>H 3.436973417 3.003880313 -0.014004760<br>H 1.265782027 -4.239948285 1.252300720 | Frequencies:<br><br>70.9830 128.1139 194.3868<br>253.2232 397.4604 489.6895<br>595.8922 614.3457 650.9878<br>730.5501 763.0833 802.6025<br>815.9195 928.1055 970.5424<br>999.4116 1051.2934 1067.0007<br>1100.9184 1166.5039 1180.2333<br>1258.0070 1313.6006 1396.8780<br>1416.2158 1465.3063 1703.3713<br>1795.8591 2937.5626 3000.6072<br>3199.3616 3225.9905 3232.1201 |
|----------------------------------------------------------------------------------------------------------------------------------------------------------------------------------------------------------------------------------------------------------------------------------------------------------------------------------------------------------------------------|----------------------------------------------------------------------------------------------------------------------------------------------------------------------------------------------------------------------------------------------------------------------------------------------------------------------------------------------------------------------------------------------------------------------------------------------------------------------------------------------------------------------------------------------------------------------------------------|----------------------------------------------------------------------------------------------------------------------------------------------------------------------------------------------------------------------------------------------------------------------------------------------------------------------------------------------------------------------------|

**R->M**

pyG\_2x5

|                                                                                                                                                                                                                                                                                                                                                                            |                                                                                                                                                                                                                                                                                                                                                                                                                                                                                                                                                                                         |                                                                                                                                                                                                                                                                                                                                                                          |
|----------------------------------------------------------------------------------------------------------------------------------------------------------------------------------------------------------------------------------------------------------------------------------------------------------------------------------------------------------------------------|-----------------------------------------------------------------------------------------------------------------------------------------------------------------------------------------------------------------------------------------------------------------------------------------------------------------------------------------------------------------------------------------------------------------------------------------------------------------------------------------------------------------------------------------------------------------------------------------|--------------------------------------------------------------------------------------------------------------------------------------------------------------------------------------------------------------------------------------------------------------------------------------------------------------------------------------------------------------------------|
| b3lyp -382.0723462<br>uccsd(t) -381.0914114<br>ump2(3df,2p) -381.2032436<br>ump2(d,p) -380.9712085<br>rmp2(d,p) -381.001063709193<br>rccsd(t) -381.09340622<br>-----<br>ZPE 0.0880134<br>Thermal 0.096063<br>S2: 0.782802<br>-----<br>G2M(UMP2,CC) Energy (OK): -381.2354331<br>T1 Diag: 0.04518032<br><br>G2M(UMP2,RCC) Energy (OK): -381.23742792<br>T1 Diag: 0.01953784 | Geometry:<br><br>C -2.520785055 0.243923959 -1.876662455<br>C -1.204182624 1.671462763 0.192417584<br>C 3.692252740 0.299013256 -0.254489418<br>C -0.598943028 -0.280172686 2.188287742<br>C -1.623794422 -2.494241962 1.428090604<br>C -2.777530806 -2.166102358 -1.103779585<br>H -3.160007596 1.104414533 -3.612710388<br>H 0.265204165 0.171611699 3.981826814<br>H -3.677015878 -3.682715292 -2.139383520<br>O -0.781388527 3.926667598 0.288840860<br>O 5.062022616 -1.341452330 -0.808749872<br>H 4.125107739 2.347007730 0.039174023<br>H -1.600454414 -4.265340535 2.447170774 | Frequencies:<br><br>-171.3771 26.6909 74.0562<br>103.3969 222.0308 237.2198<br>296.1587 454.4578 484.7856<br>646.8441 666.9063 734.4409<br>747.6129 810.0158 853.9776<br>925.5278 960.4058 976.3603<br>1033.2511 1085.7547 1094.3163<br>1131.9947 1301.3096 1358.7019<br>1476.3429 1610.1223 1750.3171<br>1930.7959 2748.5371 3201.4523<br>3213.0724 3234.7511 3241.8103 |
|----------------------------------------------------------------------------------------------------------------------------------------------------------------------------------------------------------------------------------------------------------------------------------------------------------------------------------------------------------------------------|-----------------------------------------------------------------------------------------------------------------------------------------------------------------------------------------------------------------------------------------------------------------------------------------------------------------------------------------------------------------------------------------------------------------------------------------------------------------------------------------------------------------------------------------------------------------------------------------|--------------------------------------------------------------------------------------------------------------------------------------------------------------------------------------------------------------------------------------------------------------------------------------------------------------------------------------------------------------------------|

**M**

pyG\_2x6b

|                                                                                                                                                                                                                                                                                                                                                                                            |                                                                                                                                                                                                                                                                                                                                                                                                                                                                   |                                                                                                                                                                                                                                                                                                                                                                                                                                                                                                                                                 |          |          |          |          |          |          |          |          |          |          |          |          |           |           |           |           |           |           |           |           |           |           |           |           |
|--------------------------------------------------------------------------------------------------------------------------------------------------------------------------------------------------------------------------------------------------------------------------------------------------------------------------------------------------------------------------------------------|-------------------------------------------------------------------------------------------------------------------------------------------------------------------------------------------------------------------------------------------------------------------------------------------------------------------------------------------------------------------------------------------------------------------------------------------------------------------|-------------------------------------------------------------------------------------------------------------------------------------------------------------------------------------------------------------------------------------------------------------------------------------------------------------------------------------------------------------------------------------------------------------------------------------------------------------------------------------------------------------------------------------------------|----------|----------|----------|----------|----------|----------|----------|----------|----------|----------|----------|----------|-----------|-----------|-----------|-----------|-----------|-----------|-----------|-----------|-----------|-----------|-----------|-----------|
| <p>b3lyp -268.181045<br/>uccsd(t) -267.4796362<br/>ump2(3df,2p) -267.5703898<br/>ump2(d,p) -267.4069979<br/>rmp2(d,p) -267.406997682929<br/>rccsd(t) -267.47963798<br/>-----<br/>ZPE 0.073744<br/>Thermal 0.0784656<br/>S2: 0.0<br/>-----<br/>G2M(UMP2,CC) Energy (0K): -267.5692841<br/>T1 Diag: 0.01506520<br/><br/>G2M(UMP2,RCC) Energy (0K): -267.56928588<br/>T1 Diag: 0.01506285</p> | <p>Geometry:</p> <p>C 0.000000000 2.276643777 -0.167388161<br/>C 0.000000000 -2.276643777 -0.167388161<br/>C 0.000000000 0.000000000 1.555900341<br/>C 0.000000000 -1.420692326 -2.546062032<br/>C 0.000000000 1.420692326 -2.546062032<br/>H 0.000000000 4.201494248 0.508827658<br/>H 0.000000000 -4.201494248 0.508827658<br/>H 0.000000000 2.543658300 -4.254969718<br/>H 0.000000000 -2.543658300 -4.254969718<br/>O 0.000000000 0.000000000 3.839785549</p> | <p>Frequencies:</p> <table><tr><td>209.2796</td><td>452.9560</td><td>461.3809</td></tr><tr><td>644.1118</td><td>658.9938</td><td>730.8401</td></tr><tr><td>738.7064</td><td>841.7125</td><td>850.4287</td></tr><tr><td>953.7481</td><td>966.1207</td><td>966.4876</td></tr><tr><td>1094.0397</td><td>1096.2094</td><td>1131.4352</td></tr><tr><td>1303.0989</td><td>1349.1482</td><td>1580.8993</td></tr><tr><td>1650.9425</td><td>1791.6672</td><td>3200.0461</td></tr><tr><td>3210.4918</td><td>3242.4200</td><td>3244.6954</td></tr></table> | 209.2796 | 452.9560 | 461.3809 | 644.1118 | 658.9938 | 730.8401 | 738.7064 | 841.7125 | 850.4287 | 953.7481 | 966.1207 | 966.4876 | 1094.0397 | 1096.2094 | 1131.4352 | 1303.0989 | 1349.1482 | 1580.8993 | 1650.9425 | 1791.6672 | 3200.0461 | 3210.4918 | 3242.4200 | 3244.6954 |
| 209.2796                                                                                                                                                                                                                                                                                                                                                                                   | 452.9560                                                                                                                                                                                                                                                                                                                                                                                                                                                          | 461.3809                                                                                                                                                                                                                                                                                                                                                                                                                                                                                                                                        |          |          |          |          |          |          |          |          |          |          |          |          |           |           |           |           |           |           |           |           |           |           |           |           |
| 644.1118                                                                                                                                                                                                                                                                                                                                                                                   | 658.9938                                                                                                                                                                                                                                                                                                                                                                                                                                                          | 730.8401                                                                                                                                                                                                                                                                                                                                                                                                                                                                                                                                        |          |          |          |          |          |          |          |          |          |          |          |          |           |           |           |           |           |           |           |           |           |           |           |           |
| 738.7064                                                                                                                                                                                                                                                                                                                                                                                   | 841.7125                                                                                                                                                                                                                                                                                                                                                                                                                                                          | 850.4287                                                                                                                                                                                                                                                                                                                                                                                                                                                                                                                                        |          |          |          |          |          |          |          |          |          |          |          |          |           |           |           |           |           |           |           |           |           |           |           |           |
| 953.7481                                                                                                                                                                                                                                                                                                                                                                                   | 966.1207                                                                                                                                                                                                                                                                                                                                                                                                                                                          | 966.4876                                                                                                                                                                                                                                                                                                                                                                                                                                                                                                                                        |          |          |          |          |          |          |          |          |          |          |          |          |           |           |           |           |           |           |           |           |           |           |           |           |
| 1094.0397                                                                                                                                                                                                                                                                                                                                                                                  | 1096.2094                                                                                                                                                                                                                                                                                                                                                                                                                                                         | 1131.4352                                                                                                                                                                                                                                                                                                                                                                                                                                                                                                                                       |          |          |          |          |          |          |          |          |          |          |          |          |           |           |           |           |           |           |           |           |           |           |           |           |
| 1303.0989                                                                                                                                                                                                                                                                                                                                                                                  | 1349.1482                                                                                                                                                                                                                                                                                                                                                                                                                                                         | 1580.8993                                                                                                                                                                                                                                                                                                                                                                                                                                                                                                                                       |          |          |          |          |          |          |          |          |          |          |          |          |           |           |           |           |           |           |           |           |           |           |           |           |
| 1650.9425                                                                                                                                                                                                                                                                                                                                                                                  | 1791.6672                                                                                                                                                                                                                                                                                                                                                                                                                                                         | 3200.0461                                                                                                                                                                                                                                                                                                                                                                                                                                                                                                                                       |          |          |          |          |          |          |          |          |          |          |          |          |           |           |           |           |           |           |           |           |           |           |           |           |
| 3210.4918                                                                                                                                                                                                                                                                                                                                                                                  | 3242.4200                                                                                                                                                                                                                                                                                                                                                                                                                                                         | 3244.6954                                                                                                                                                                                                                                                                                                                                                                                                                                                                                                                                       |          |          |          |          |          |          |          |          |          |          |          |          |           |           |           |           |           |           |           |           |           |           |           |           |
