# Supplementary material for: Isolation and characterization of charge-tagged phenylperoxyl radicals in the gas phase: direct evidence for products and pathways in low temperature benzene oxidation
Source: Royal Society of Chemistry journal article supplement (doi:10.1039/c2cp43507a), 2012-01-01
Supplement: c2cp43507a_5.pdf [file c2cp43507a_5.pdf]

**peroxy**

sphE501

|                                                                                                                                                                                                                 |                                                                                                                                                                                                                                                                                                                                                                                                                                                                                                                                                                                                |                                                                                                                                                                                                                                                                                                                                                                                                                                                                                                                                                                                                                                      |
|-----------------------------------------------------------------------------------------------------------------------------------------------------------------------------------------------------------------|------------------------------------------------------------------------------------------------------------------------------------------------------------------------------------------------------------------------------------------------------------------------------------------------------------------------------------------------------------------------------------------------------------------------------------------------------------------------------------------------------------------------------------------------------------------------------------------------|--------------------------------------------------------------------------------------------------------------------------------------------------------------------------------------------------------------------------------------------------------------------------------------------------------------------------------------------------------------------------------------------------------------------------------------------------------------------------------------------------------------------------------------------------------------------------------------------------------------------------------------|
| <p>[UB3LYP 6-311++G(d,p);Freq]<br/>HF = -1005.4513091<br/>S2 = 0.759532<br/>[Thermochemistry]<br/>Zero-point Correction = 0.097507<br/>Enthalpy Correction = 0.108840<br/>Free Energy Correction = 0.058511</p> | <p>Geometry:</p> <p>S -2.307021 -0.073042 0.006076<br/>C -0.482289 0.053132 -0.037959<br/>C 0.295728 -1.109923 -0.032134<br/>C 1.682953 -1.037281 -0.014827<br/>C 2.275938 0.223900 -0.000918<br/>C 1.522015 1.397929 -0.009191<br/>C 0.135165 1.304597 -0.025981<br/>H -0.486952 2.190880 -0.046860<br/>H 2.028972 2.356129 -0.005226<br/>H 2.304871 -1.921550 -0.015192<br/>H -0.204370 -2.070521 -0.058764<br/>O -2.605954 -1.226682 -0.877072<br/>O -2.600978 -0.314349 1.441298<br/>O -2.771584 1.240963 -0.501611<br/>O 3.654878 0.422909 0.014439<br/>O 4.410232 -0.670388 0.017307</p> | <p>Frequencies:</p> <p>12.4671      66.5594      114.1287<br/>140.8911      214.9970      237.4367<br/>268.6999      358.8005      362.4787<br/>413.7777      479.5561      487.5253<br/>519.2632      540.4495      603.5982<br/>636.4017      668.4223      707.0712<br/>814.2672      825.2426      842.1116<br/>953.6944      974.1600      982.5644<br/>1026.5126      1086.0650      1103.7690<br/>1107.7381      1145.3578      1163.7209<br/>1177.4937      1188.8326      1308.6002<br/>1346.7316      1429.5895      1492.5700<br/>1596.6303      1617.7648      3177.5592<br/>3191.2283      3198.8062      3217.2696</p> |
|-----------------------------------------------------------------------------------------------------------------------------------------------------------------------------------------------------------------|------------------------------------------------------------------------------------------------------------------------------------------------------------------------------------------------------------------------------------------------------------------------------------------------------------------------------------------------------------------------------------------------------------------------------------------------------------------------------------------------------------------------------------------------------------------------------------------------|--------------------------------------------------------------------------------------------------------------------------------------------------------------------------------------------------------------------------------------------------------------------------------------------------------------------------------------------------------------------------------------------------------------------------------------------------------------------------------------------------------------------------------------------------------------------------------------------------------------------------------------|

## phenyl

sphE601

|                                                                                                                                                                                                                |                                                                                                                                                                                                                                                                                                                                                                                                                                                                                                              |                                                                                                                                                                                                                                                                                                                                                                                                                                                                                                                                                                                                                                                                                                  |
|----------------------------------------------------------------------------------------------------------------------------------------------------------------------------------------------------------------|--------------------------------------------------------------------------------------------------------------------------------------------------------------------------------------------------------------------------------------------------------------------------------------------------------------------------------------------------------------------------------------------------------------------------------------------------------------------------------------------------------------|--------------------------------------------------------------------------------------------------------------------------------------------------------------------------------------------------------------------------------------------------------------------------------------------------------------------------------------------------------------------------------------------------------------------------------------------------------------------------------------------------------------------------------------------------------------------------------------------------------------------------------------------------------------------------------------------------|
| <p>[UB3LYP 6-311++G(d,p);Freq]<br/>HF = -855.0007072<br/>S2 = 0.757322<br/>[Thermochemistry]<br/>Zero-point Correction = 0.089122<br/>Enthalpy Correction = 0.098405<br/>Free Energy Correction = 0.052785</p> | <p>Geometry:</p> <p>S -0.030402 -1.500881 0.000000<br/>C 0.041129 0.332538 0.000000<br/>C 0.040749 1.024998 1.210075<br/>C 0.040749 2.429068 1.222022<br/>C 0.036181 3.061006 0.000000<br/>C 0.040749 2.429068 -1.222022<br/>C 0.040749 1.024998 -1.210075<br/>H 0.059905 0.462454 -2.136830<br/>H 0.047401 2.974694 -2.160236<br/>H 0.047401 2.974694 2.160236<br/>H 0.059905 0.462454 2.136830<br/>O 0.669284 -1.890340 1.250662<br/>O -1.484820 -1.803102 0.000000<br/>O 0.669284 -1.890340 -1.250662</p> | <p>Frequencies:</p> <p>7.4720            121.4238            174.2738<br/>284.4160            299.2445            347.2604<br/>399.6616            455.5578            518.9745<br/>525.7099            597.3087            608.6792<br/>671.6658            701.3894            785.0037<br/>788.2823            929.9713            958.6267<br/>965.8168            996.8974            1045.3000<br/>1086.4649            1090.3143            1161.5788<br/>1168.3655            1171.1588            1289.1357<br/>1309.4474            1373.1840            1460.2420<br/>1552.3147            1609.2848            3150.5571<br/>3150.9514            3181.6044            3182.3065</p> |
|----------------------------------------------------------------------------------------------------------------------------------------------------------------------------------------------------------------|--------------------------------------------------------------------------------------------------------------------------------------------------------------------------------------------------------------------------------------------------------------------------------------------------------------------------------------------------------------------------------------------------------------------------------------------------------------------------------------------------------------|--------------------------------------------------------------------------------------------------------------------------------------------------------------------------------------------------------------------------------------------------------------------------------------------------------------------------------------------------------------------------------------------------------------------------------------------------------------------------------------------------------------------------------------------------------------------------------------------------------------------------------------------------------------------------------------------------|

## Ipsos TS

sphE201

|                                                                                                                                                                                                                 |                                                                                                                                                                                                                                                                                                                                                                                                                                                                                                                                                                                         |                                                                                                                                                                                                                                                                                                                                                                                                                                                                                                                                                                                                                                     |
|-----------------------------------------------------------------------------------------------------------------------------------------------------------------------------------------------------------------|-----------------------------------------------------------------------------------------------------------------------------------------------------------------------------------------------------------------------------------------------------------------------------------------------------------------------------------------------------------------------------------------------------------------------------------------------------------------------------------------------------------------------------------------------------------------------------------------|-------------------------------------------------------------------------------------------------------------------------------------------------------------------------------------------------------------------------------------------------------------------------------------------------------------------------------------------------------------------------------------------------------------------------------------------------------------------------------------------------------------------------------------------------------------------------------------------------------------------------------------|
| <p>[UB3LYP 6-311++G(d,p);Freq]<br/>HF = -1005.4110599<br/>S2 = 0.777839<br/>[Thermochemistry]<br/>Zero-point Correction = 0.095294<br/>Enthalpy Correction = 0.106400<br/>Free Energy Correction = 0.055713</p> | <p>Geometry:</p> <p>C -1.651116 -1.233690 0.195897<br/>C -2.371217 -0.000001 0.209390<br/>C -1.651127 1.233693 0.195897<br/>C -0.278169 -1.222317 0.128175<br/>C 0.423023 0.000013 0.093946<br/>C -0.278177 1.222334 0.128172<br/>H -2.222224 -2.152874 0.239930<br/>H -2.222244 2.152872 0.239930<br/>H 0.293871 2.142049 0.130960<br/>H 0.293877 -2.142032 0.130967<br/>O -3.689273 0.000000 -0.958009<br/>O -3.709436 -0.000006 0.515925<br/>S 2.237313 0.000004 -0.049335<br/>O 2.655129 1.250928 0.626658<br/>O 2.655149 -1.250527 0.627378<br/>O 2.450982 -0.000430 -1.519615</p> | <p>Frequencies:</p> <p>-388.7180      4.0668      70.5085<br/>149.9269      170.0272      191.0752<br/>248.7930      311.4410      326.1915<br/>393.5230      434.0215      455.0888<br/>510.9626      515.7511      550.2545<br/>622.0109      637.5604      690.5474<br/>790.5273      799.3172      820.8595<br/>865.7848      968.6607      973.2008<br/>984.4180      1009.6725      1082.3784<br/>1109.2341      1152.2095      1167.0943<br/>1178.3817      1251.2108      1291.2653<br/>1315.3210      1438.1485      1466.0471<br/>1518.2948      1585.6708      3187.5548<br/>3188.4422      3201.0598      3202.8002</p> |
|-----------------------------------------------------------------------------------------------------------------------------------------------------------------------------------------------------------------|-----------------------------------------------------------------------------------------------------------------------------------------------------------------------------------------------------------------------------------------------------------------------------------------------------------------------------------------------------------------------------------------------------------------------------------------------------------------------------------------------------------------------------------------------------------------------------------------|-------------------------------------------------------------------------------------------------------------------------------------------------------------------------------------------------------------------------------------------------------------------------------------------------------------------------------------------------------------------------------------------------------------------------------------------------------------------------------------------------------------------------------------------------------------------------------------------------------------------------------------|

## phenoxyI

sph301

|                                                                                                                                                                                                                |                                                                                                                                                                                                                                                                                                                                                                                                                                                                                                                                                |                                                                                                                                                                                                                                                                                                                                                                                                                                                                                                                                                                                           |
|----------------------------------------------------------------------------------------------------------------------------------------------------------------------------------------------------------------|------------------------------------------------------------------------------------------------------------------------------------------------------------------------------------------------------------------------------------------------------------------------------------------------------------------------------------------------------------------------------------------------------------------------------------------------------------------------------------------------------------------------------------------------|-------------------------------------------------------------------------------------------------------------------------------------------------------------------------------------------------------------------------------------------------------------------------------------------------------------------------------------------------------------------------------------------------------------------------------------------------------------------------------------------------------------------------------------------------------------------------------------------|
| <p>[UB3LYP 6-311++G(d,p);Freq]<br/>HF = -930.3048808<br/>S2 = 0.777296<br/>[Thermochemistry]<br/>Zero-point Correction = 0.093519<br/>Enthalpy Correction = 0.103789<br/>Free Energy Correction = 0.056182</p> | <p>Geometry:</p> <p>S -0.035585 -1.902222 0.000000<br/>C 0.046494 -0.086814 0.000000<br/>C 0.044378 0.617392 1.224694<br/>C 0.044378 1.988954 1.235575<br/>C 0.041581 2.754073 0.000000<br/>C 0.044378 1.988954 -1.235575<br/>C 0.044378 0.617392 -1.224694<br/>H 0.060492 0.041899 -2.142757<br/>H 0.049520 2.552774 -2.162265<br/>H 0.049520 2.552774 2.162265<br/>H 0.060492 0.041899 2.142757<br/>O 0.651372 -2.302284 1.250664<br/>O -1.500215 -2.159132 0.000000<br/>O 0.651372 -2.302284 -1.250664<br/>O 0.041947 4.009512 0.000000</p> | <p>Frequencies:</p> <p>12.7556      80.4638      162.8513<br/>183.6661      265.7743      323.1172<br/>331.4810      377.2784      453.4151<br/>475.8190      516.6727      538.2660<br/>562.8029      614.3143      652.3275<br/>723.9092      786.6472      808.2812<br/>853.1172      968.5462      970.4715<br/>987.0641      994.4996      1073.6910<br/>1103.3854      1148.1058      1170.8088<br/>1178.3481      1272.0795      1293.6512<br/>1412.2574      1440.6515      1489.3686<br/>1512.1365      1585.8576      3170.8183<br/>3171.0846      3191.1634      3193.0830</p> |
|----------------------------------------------------------------------------------------------------------------------------------------------------------------------------------------------------------------|------------------------------------------------------------------------------------------------------------------------------------------------------------------------------------------------------------------------------------------------------------------------------------------------------------------------------------------------------------------------------------------------------------------------------------------------------------------------------------------------------------------------------------------------|-------------------------------------------------------------------------------------------------------------------------------------------------------------------------------------------------------------------------------------------------------------------------------------------------------------------------------------------------------------------------------------------------------------------------------------------------------------------------------------------------------------------------------------------------------------------------------------------|

## Peroxy->Phenoxy vdW Complex

sphE301

|                                                                                                                                                                                                                 |                                                                                                                                                                                                                                                                                                                                                                                                                                                                                                                                                                                          |                                                                                                                                                                                                                                                                                                                                                                                                                                                                                         |
|-----------------------------------------------------------------------------------------------------------------------------------------------------------------------------------------------------------------|------------------------------------------------------------------------------------------------------------------------------------------------------------------------------------------------------------------------------------------------------------------------------------------------------------------------------------------------------------------------------------------------------------------------------------------------------------------------------------------------------------------------------------------------------------------------------------------|-----------------------------------------------------------------------------------------------------------------------------------------------------------------------------------------------------------------------------------------------------------------------------------------------------------------------------------------------------------------------------------------------------------------------------------------------------------------------------------------|
| <p>[UB3LYP 6-311++G(d,p);Freq]<br/>HF = -1005.4042623<br/>S2 = 1.353081<br/>[Thermochemistry]<br/>Zero-point Correction = 0.094427<br/>Enthalpy Correction = 0.106071<br/>Free Energy Correction = 0.054570</p> | <p>Geometry:</p> <p>C 0.492585 0.000038 0.021701<br/>C -0.202753 -1.222432 0.097053<br/>C -1.569876 -1.229186 0.250882<br/>C -2.296053 0.000195 0.361408<br/>C -1.569769 1.229480 0.250574<br/>C -0.202626 1.222575 0.096816<br/>H 0.365131 2.141301 0.012387<br/>H -2.135086 2.153044 0.304325<br/>H -2.135267 -2.152689 0.304891<br/>H 0.364859 -2.141266 0.012816<br/>O -3.562073 0.000311 0.595207<br/>O -4.581764 -0.000485 -1.005720<br/>S 2.310613 -0.000044 -0.092016<br/>O 2.711584 -0.000678 1.339041<br/>O 2.632328 -1.250566 -0.816784<br/>O 2.632612 1.250954 -0.815840</p> | <p>Frequencies:</p> <p>-240.5953 13.9090 59.6822<br/>59.7182 127.4155 162.6071<br/>227.9977 265.6264 328.9618<br/>365.6115 391.9805 441.4443<br/>483.5534 516.6440 546.9484<br/>569.7956 625.3632 651.8514<br/>729.9689 811.8093 836.4302<br/>865.1345 972.0917 973.5999<br/>992.4028 1007.5496 1082.9336<br/>1109.2083 1152.6382 1167.5472<br/>1183.9547 1291.6464 1315.0784<br/>1335.0744 1447.0479 1474.2952<br/>1515.0647 1594.6431 3178.4179<br/>3179.0781 3196.0220 3197.7608</p> |
|-----------------------------------------------------------------------------------------------------------------------------------------------------------------------------------------------------------------|------------------------------------------------------------------------------------------------------------------------------------------------------------------------------------------------------------------------------------------------------------------------------------------------------------------------------------------------------------------------------------------------------------------------------------------------------------------------------------------------------------------------------------------------------------------------------------------|-----------------------------------------------------------------------------------------------------------------------------------------------------------------------------------------------------------------------------------------------------------------------------------------------------------------------------------------------------------------------------------------------------------------------------------------------------------------------------------------|
